# Supplementary material for: Enhancing chemistry understanding and attitudes through an outreach education program on circular plastic economy: a case study with Thai twelfth-grade students
Source: publisher site journal article supplement (doi:10.1515/cti-2025-0009), 2025-07-11
Supplement: Supplementary file 1 [file j_cti-2025-0009_suppl_003.pdf]

# Supplementary Material #3

## 21-item Multiple-choice Conceptual Chemistry Questionnaire

### Research Article

“Enhancing Chemistry Understanding and Attitudes through an Outreach Education Program on Circular Plastic Economy: A Case Study with Thai Twelfth-Grade Students”

### Authors

Banjong Prasongsap<sup>1</sup>, Pawat Chaipidech<sup>1,2</sup>, & Niwat Srisawasdi<sup>1,2\*</sup>

<sup>1</sup>Faculty of Education, Khon Kaen University, Khon Kaen 40002, Thailand

<sup>2</sup>Digital Education and Learning Engineering Association, Nonthaburi 11110, Thailand

*\*Corresponding Author*



# **Module 3:**

## **Sustainable Polymer**

The final module focused on the development of sustainable polymers, exploring biodegradable alternatives and the chemistry behind polymer degradation. Interactive experiments enabled students to comprehend the lifecycle of plastics, and the scientific advancements aimed at mitigating environmental impact.

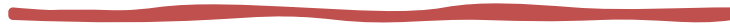

# **Experiment #1:**

## **Bioplastic Formulation**

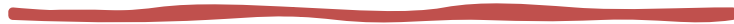

# Plastic Pollution Overview

Thailand ranks 12th globally (4.8 million tons/year). Driven by food delivery and online shopping.

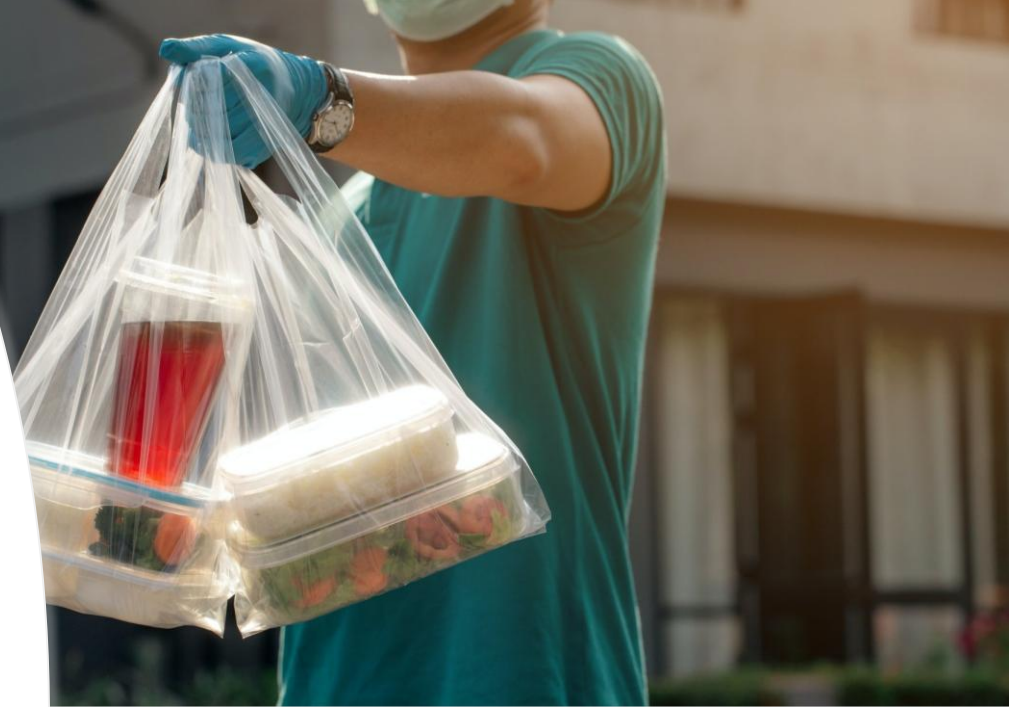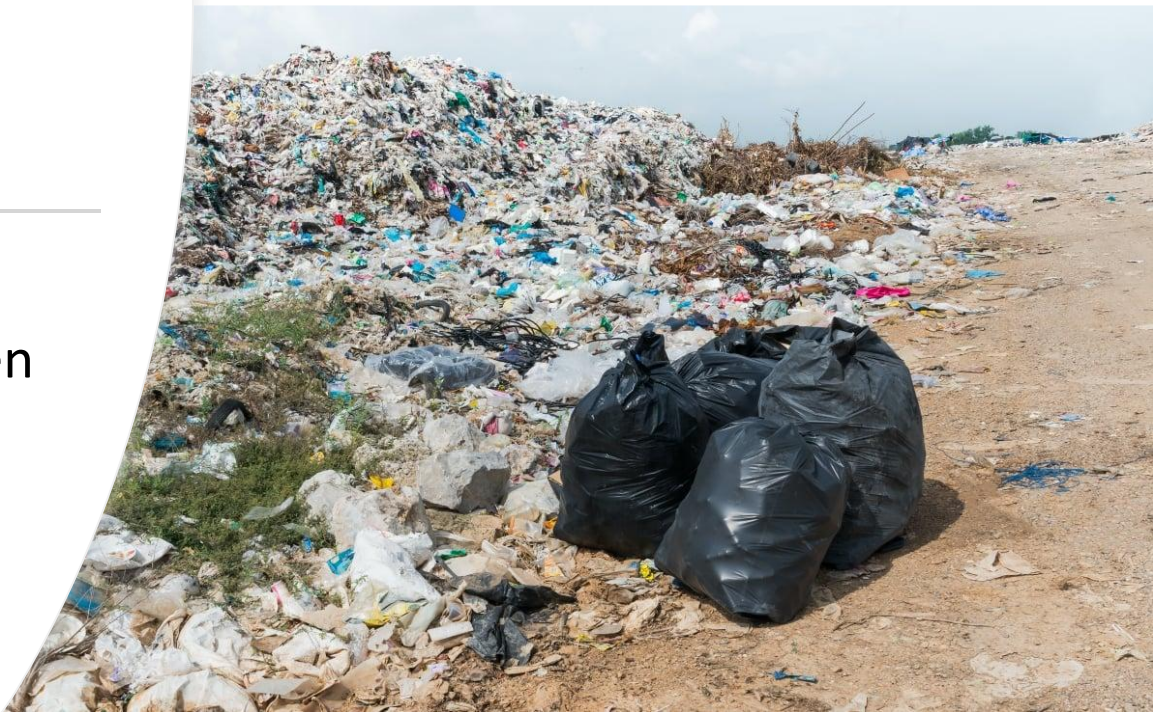



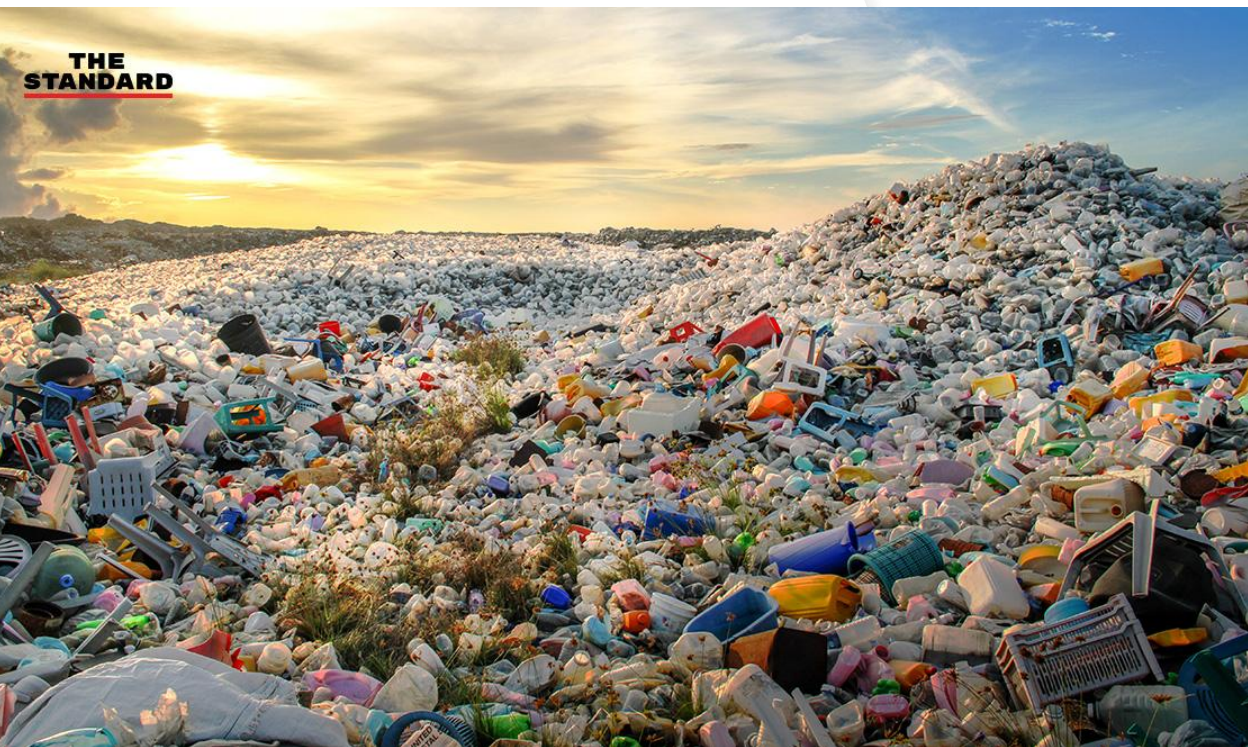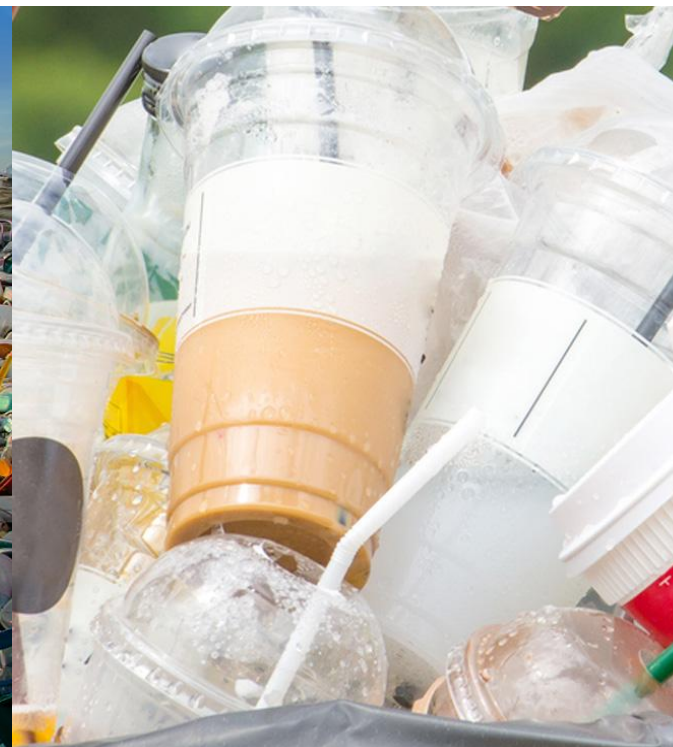

Thailand ranks 12th globally (4.8 million tons/year). Driven by food delivery and online shopping.

| ประเภทพลาสติก      | ปี 2562<br>(ตัน/วัน) | ปี 2563<br>(ตัน/วัน) | ปริมาณ (ตัน) ที่เพิ่มขึ้น<br>เทียบกับปี 62 | ร้อยละที่เพิ่มขึ้น<br>เทียบกับปี 62 |
|--------------------|----------------------|----------------------|--------------------------------------------|-------------------------------------|
| ขยะพลาสติกรวม      | 2,120                | 3,440                | 1,320                                      | 62                                  |
| ขยะพลาสติกรีไซเคิล | 495                  | 660                  | 165                                        | 33                                  |
| ขยะพลาสติกปนเปื้อน | 1,630                | 2,780                | 1,150                                      | 71                                  |

# Discussion Questions

- What do you think about the increasing plastic waste?
- Do you think plastic waste management is important to the community?
- If we cannot avoid plastic, what are your proposed solutions?

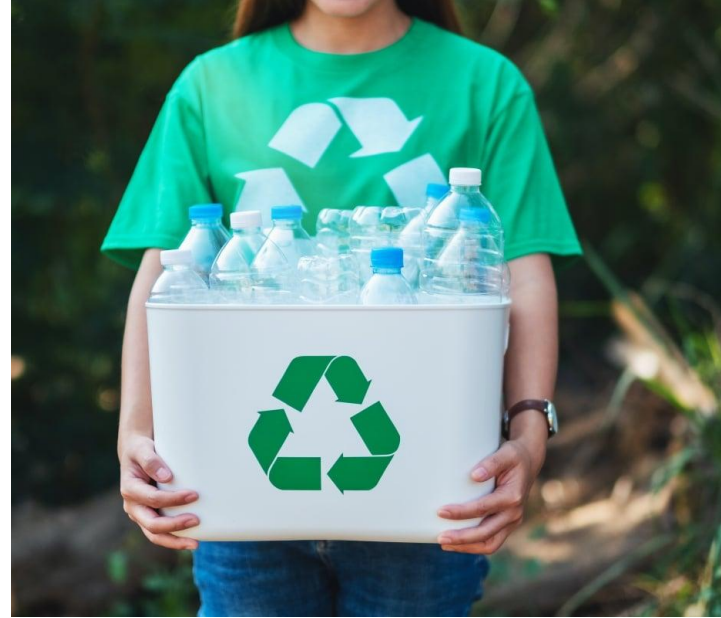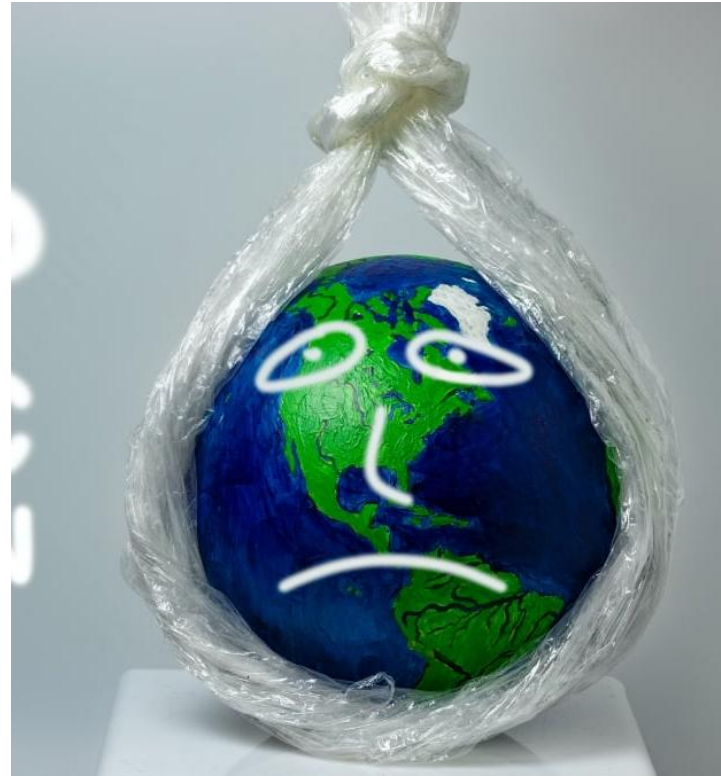

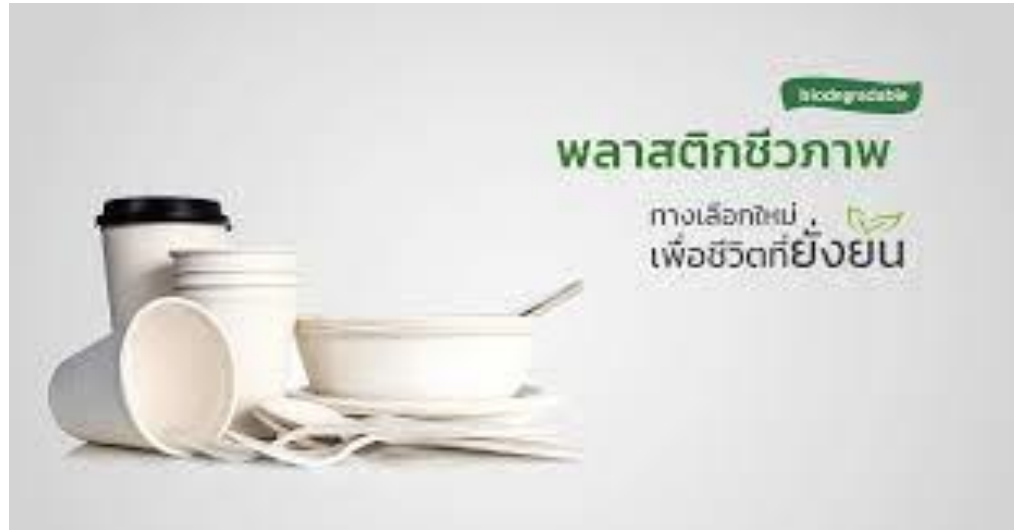

# Bioplastic Synthesis

---



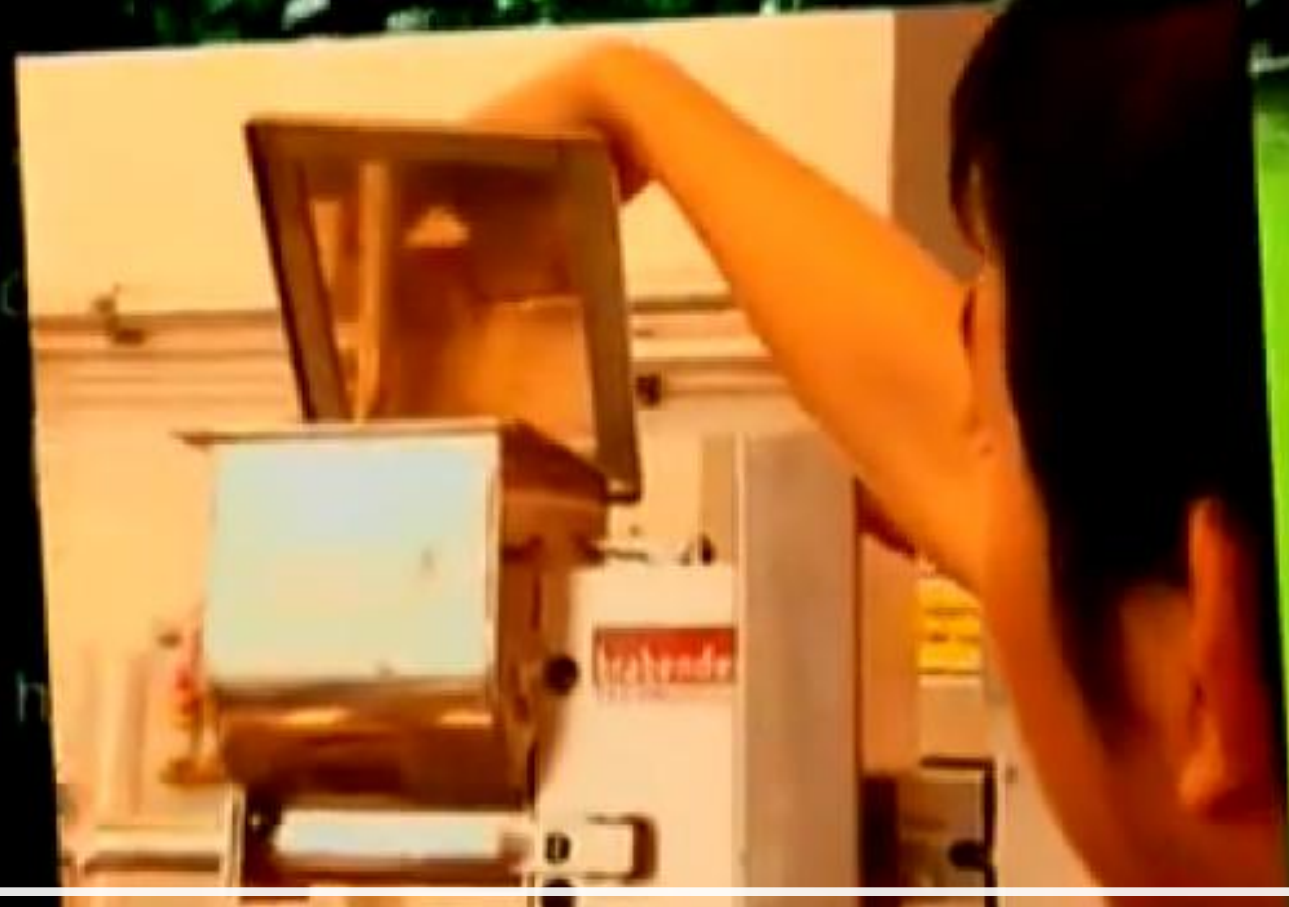

## Bioplastic Synthesis: A Case of Thailand



Start with an Open-ended  
Question:

**How is bioplastic produced?**

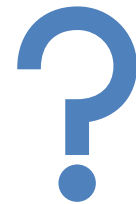

# What is Bioplastic?

- Bioplastic refers to plastic made from natural materials, mostly plants, and is biodegradable in the environment.

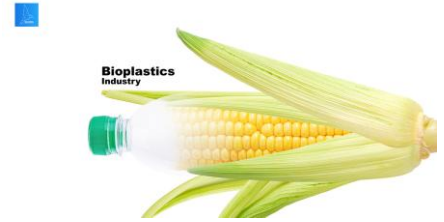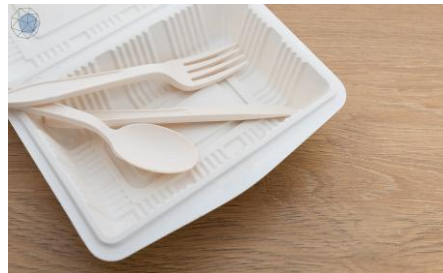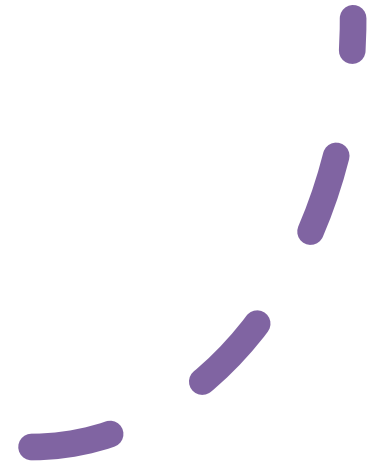

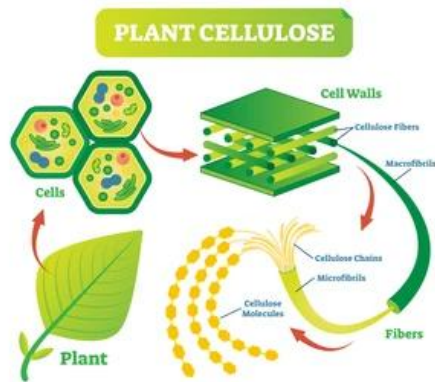

shutterstock.com · 1062942731

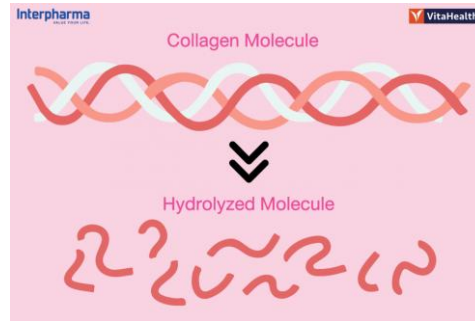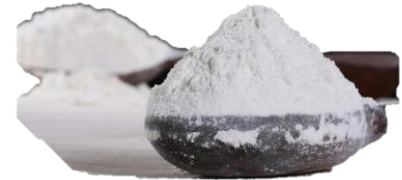

# Natural Sources of Bioplastics

Examples include:

- Cellulose
- Collagen
- Starch
- Proteins from beans and corn

# Why Use Starch?

Starch is ideal due to its abundance and low cost, derived from corn, wheat, potatoes, cassava, etc.

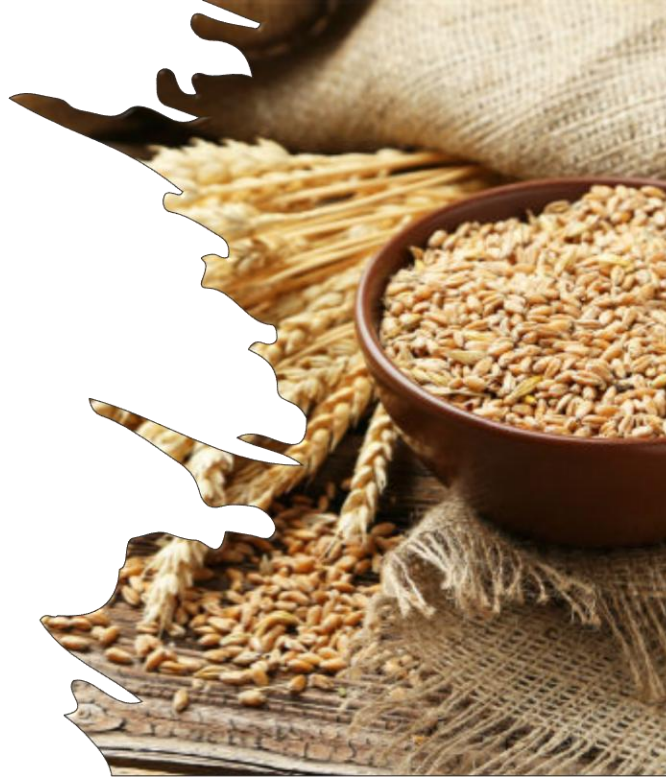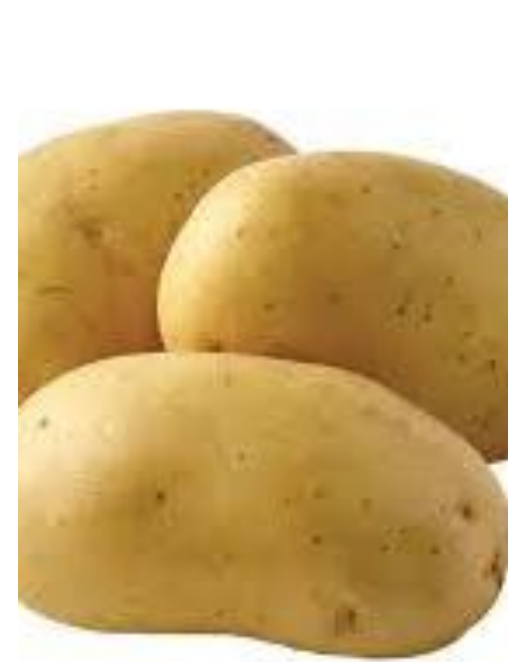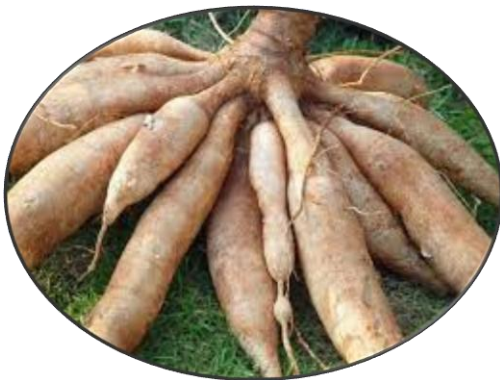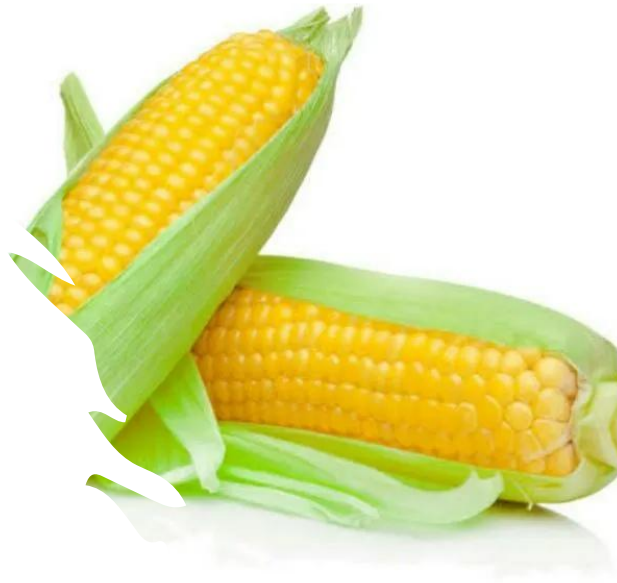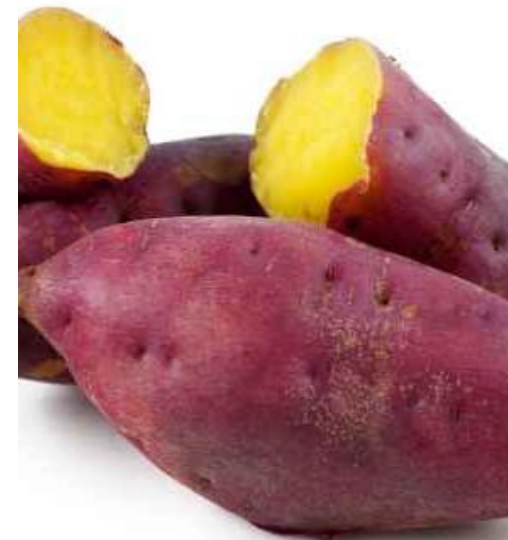



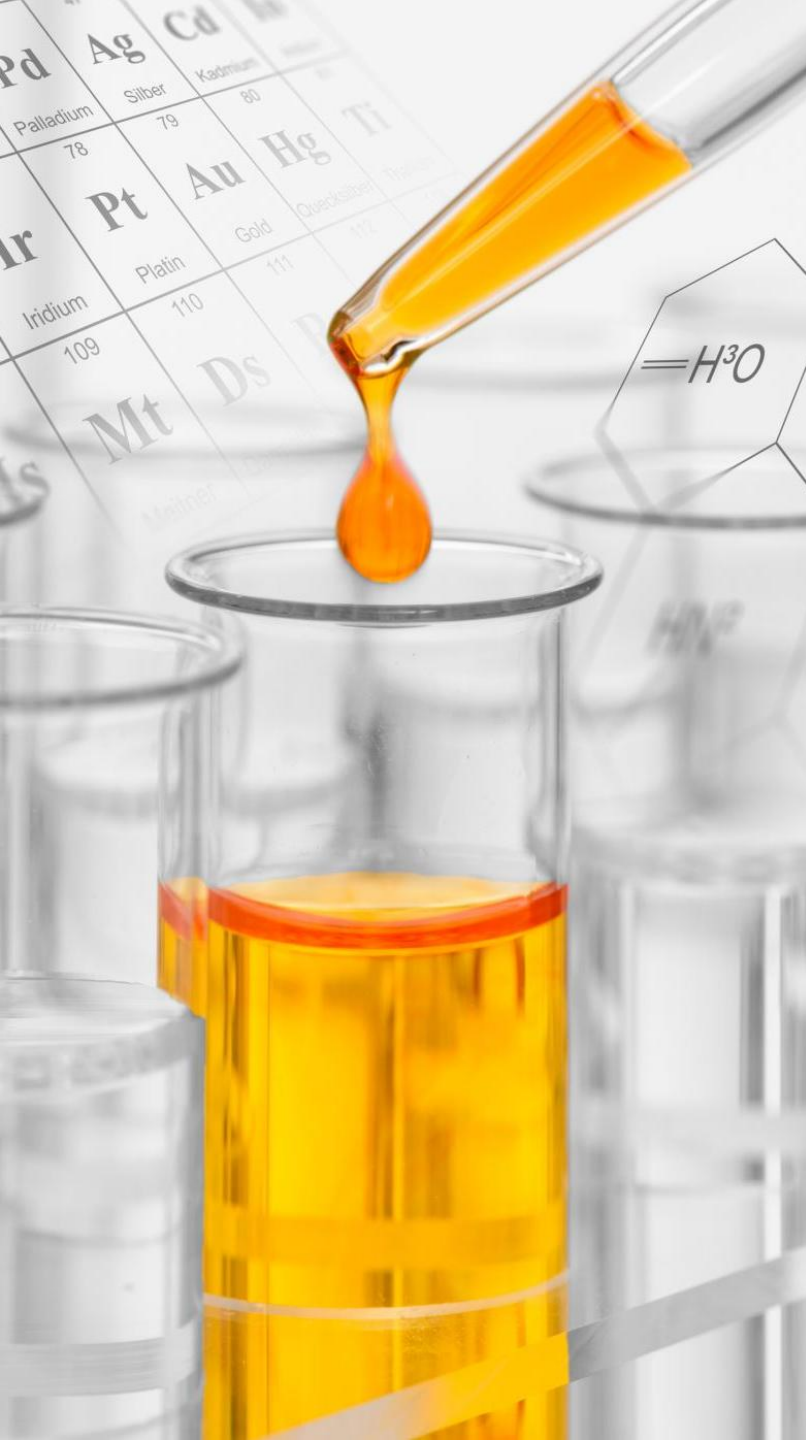

## Limitations of Starch-Based Bioplastics

- They swell and deform under moisture.  
Solution: Use microbes to convert starch to lactic acid.

# Lactic Acid to Polymer

Lactic acid (monomer) →  
Polymerization → Polylactic  
acid (PLA), a biodegradable  
polymer.

POLYMER

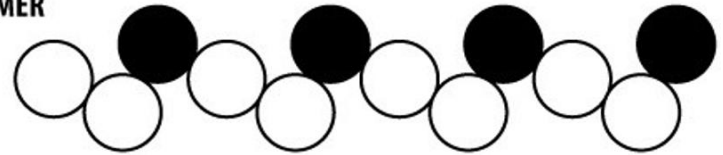

MONOMER

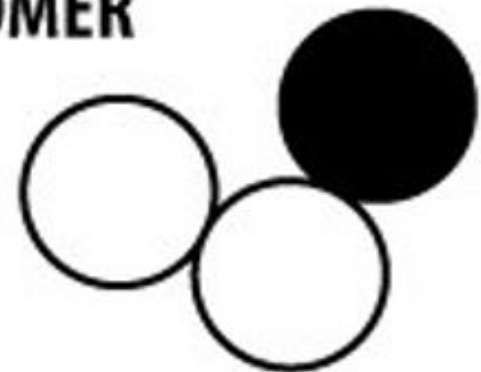

# Bioplastic Synthesis Process

How to make  
bioplastic Sample 1

See the 360-degree instructional video on the  
synthesis process.

Mass 3.2 g of tapioca starch

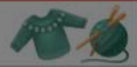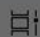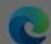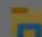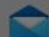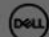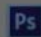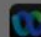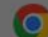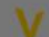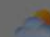

21°C มีเมฆส่วนใหญ่

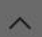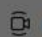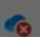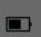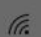

ENG

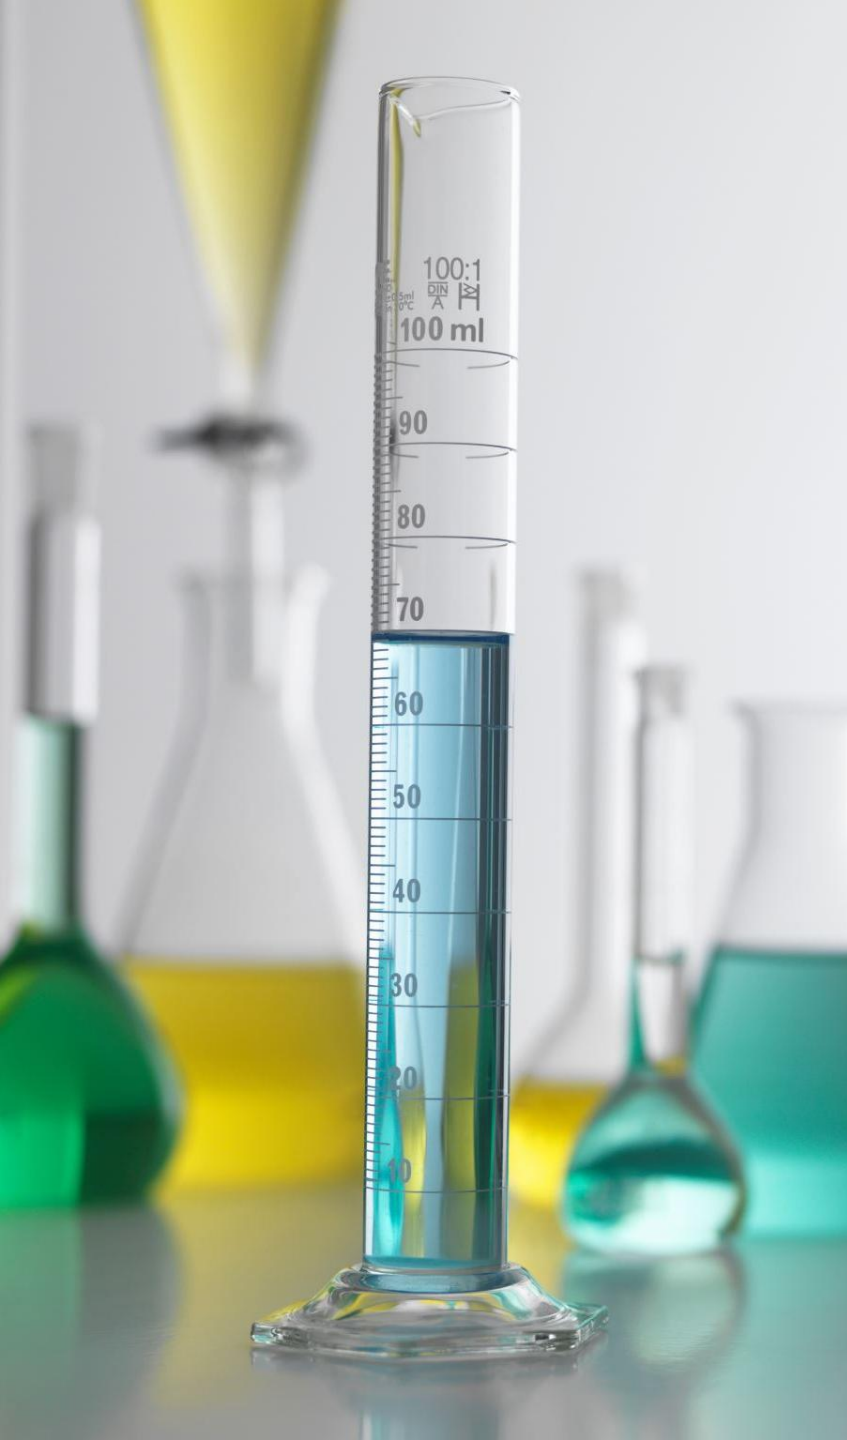

# Equipment

- Equipment:
- 1. Two chemical spoons
- 2. Two 10 mL measuring cylinders
- 3. 150 mL beaker
- 4. Two stirring rods
- 5. Hotplate



# Chemicals

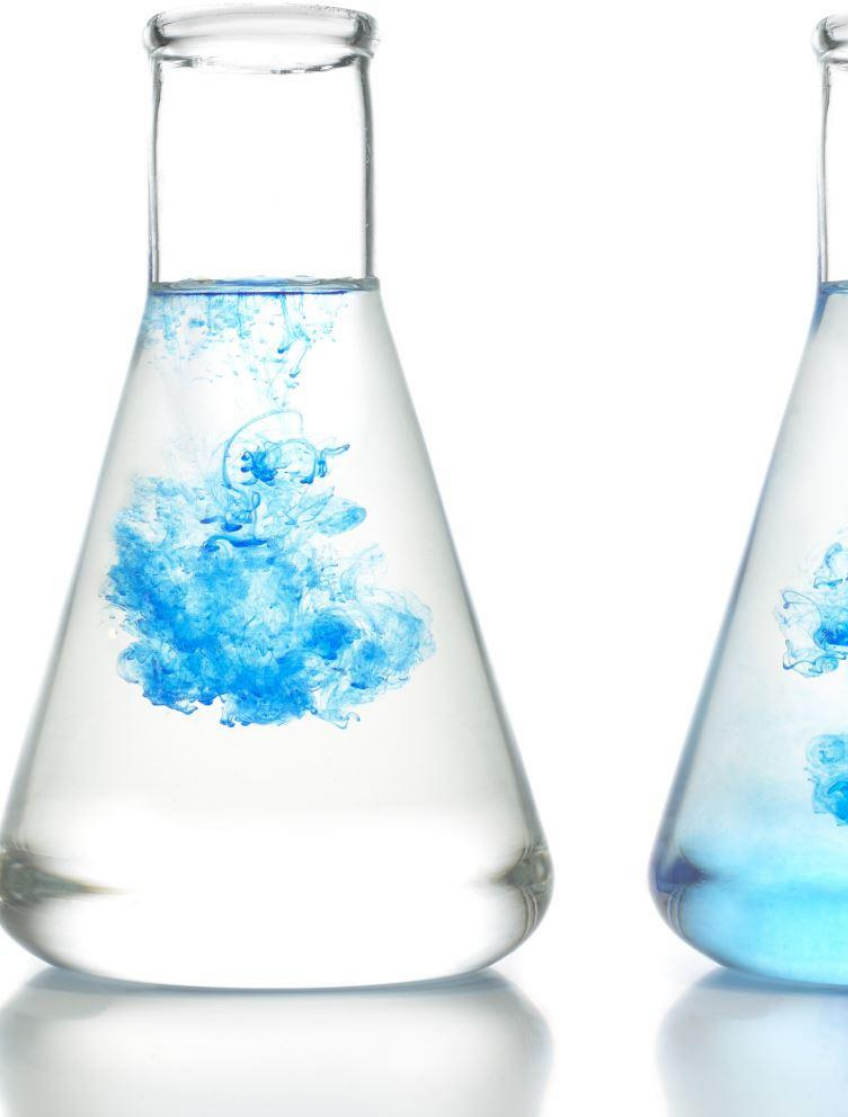

- Chemicals:
- 1. Tapioca starch 3.2 g
- 2. Citric acid 0.5 g
- 3. Distilled water 10 mL
- 4. Vinegar 10 mL

# Step 1: Weighing

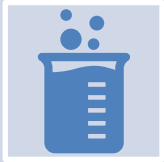

Weigh 3.2 g of tapioca starch into a 150 mL beaker.

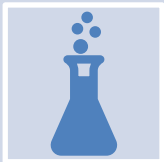

Add 0.5 g citric acid.

## Step 2: Mixing

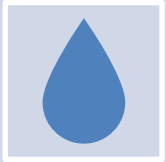

Add 10 mL distilled water and 10 mL vinegar.

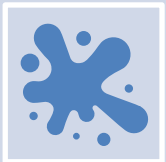

Stir the mixture thoroughly.

## Step 3: Heating

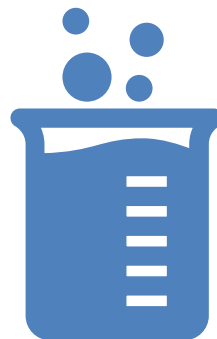

5. Place the beaker on a hotplate at low heat (scale 1). Stir continuously (~10-15 mins).
6. Stir the mixture continuously until it starts to thicken (~10–15 minutes). Do not overheat, or the mixture will clump. If it does clump, remove it from the hot plate and stir until smooth.
7. Once thickened, remove the beaker from the hot plate.

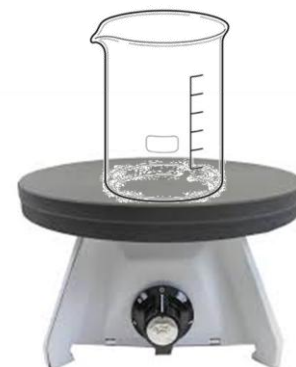



## Step 4: Coloring

8. Add 1 drop of yellow food coloring and stir until fully mixed.
9. Return the mixture to the **hot plate** and continue heating until the polymer becomes fully translucent (~30 minutes).
10. Pour into molds and let set for 48–72 hours.

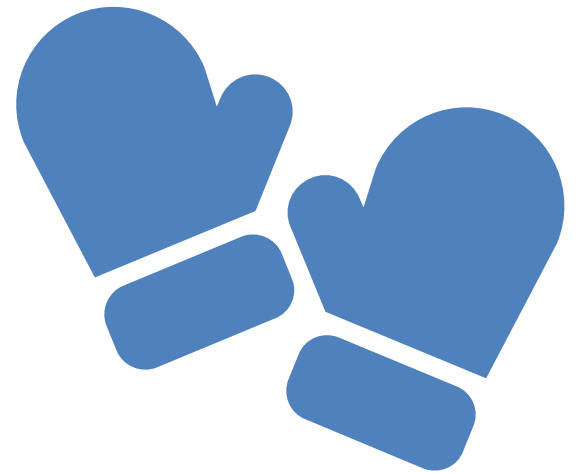

# Record Your Observations

- .....
- .....

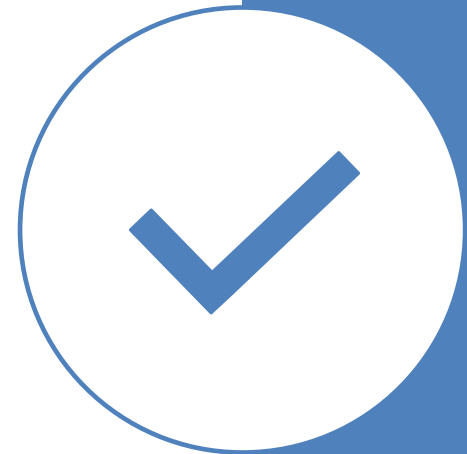

# Conclusion

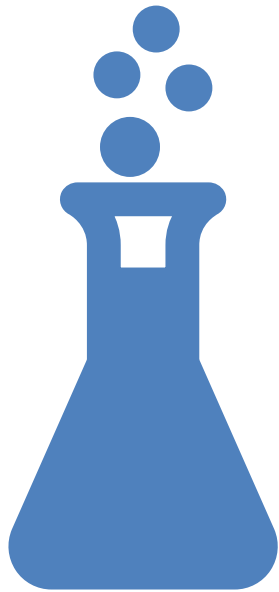

- Summarize the outcome of the experiment:
- .....



# Reflection Activity

---

Brainstorm ideas on paper  
using blue or black pen.

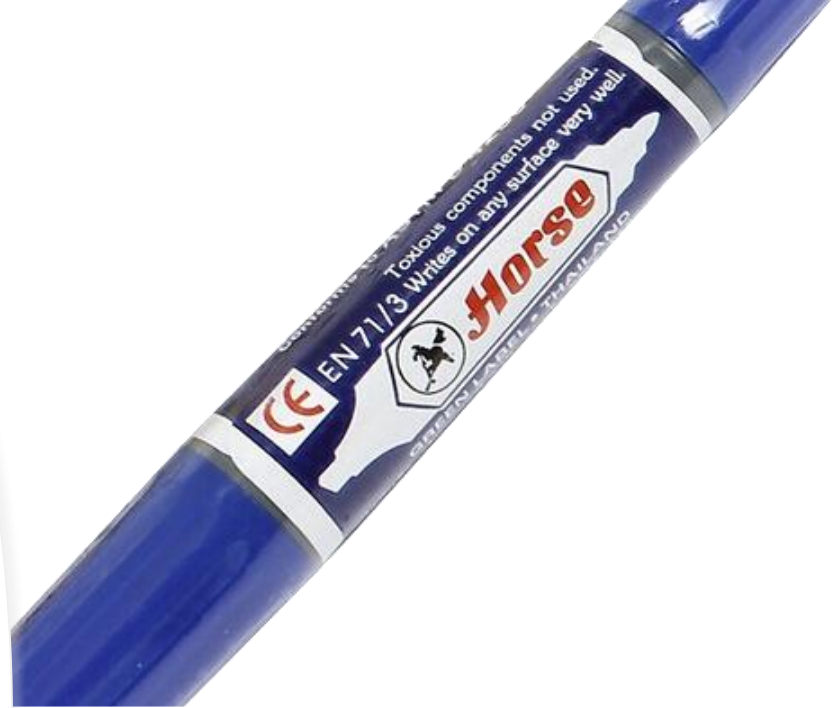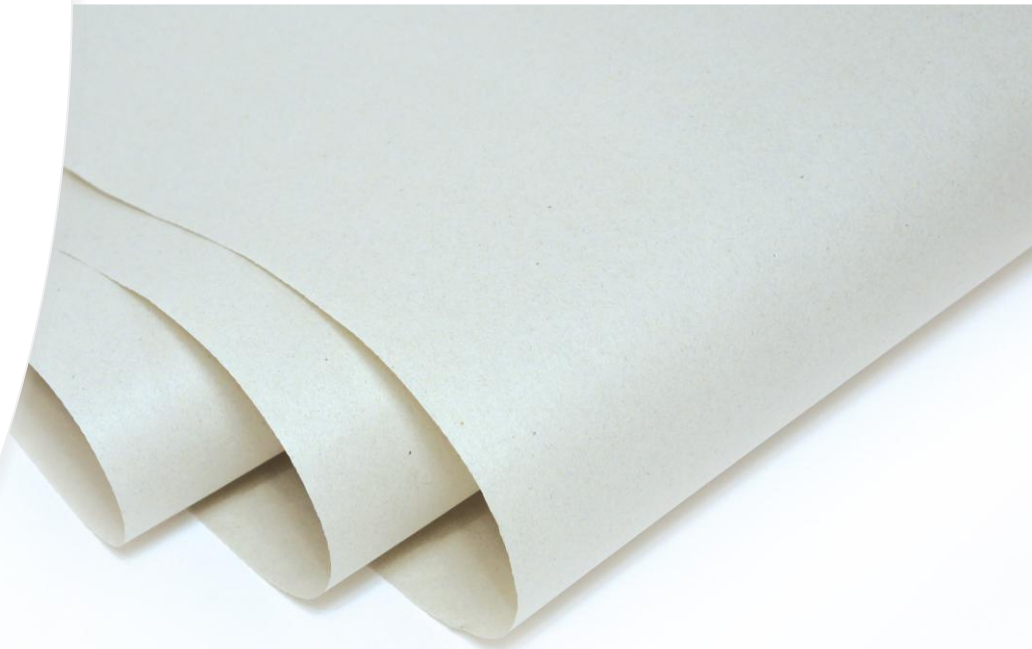

# Flowchart Task

- Create a flowchart showing the bioplastic synthesis process.
- Example shown as follows.

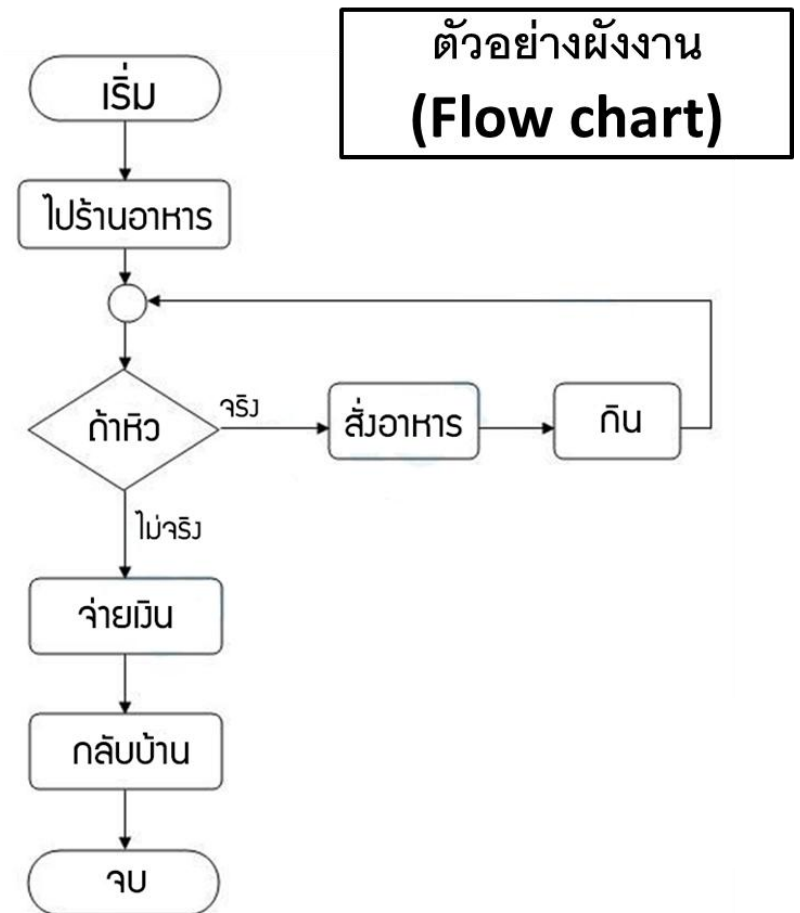

## Conclusion from the Main Question

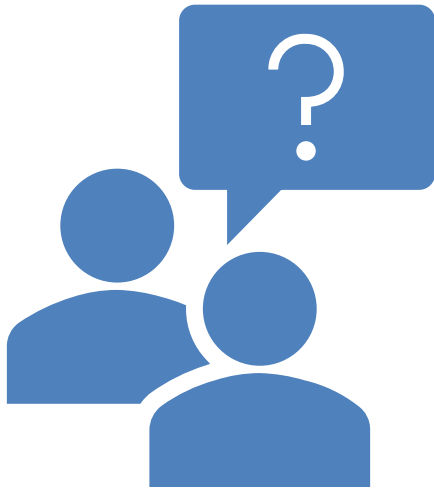

- Summarize your learning based on the initial question:
- .....



# **Experiment #2:**

## **Biodegradation of Bioplastics**



# Topic Introduction

- Biodegradation of Bioplastics

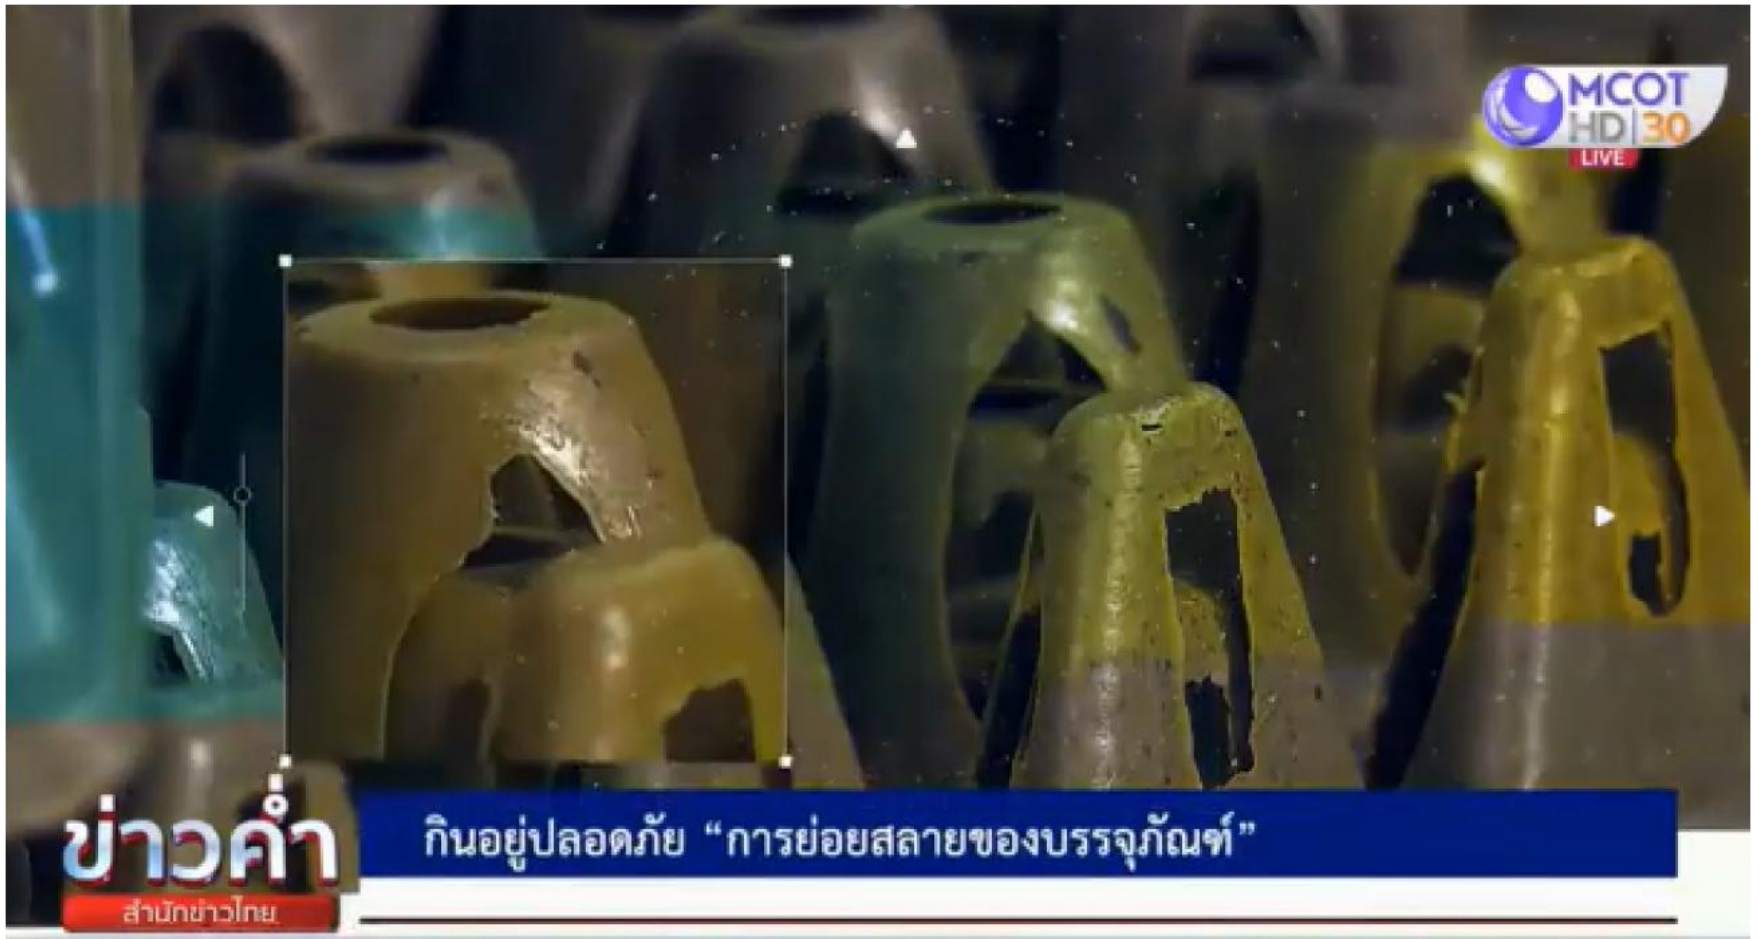

ข่าวค่ำ

สำนักข่าวไทย

กินอยู่ปลอดภัย “การย่อยสลายของบรรจุภัณฑ์”



# Guiding Question

How does the biodegradation of bioplastics differ from that of PET?

# Concept of Biodegradable Plastics

- Biodegradable plastics can be decomposed by natural microorganisms, ultimately breaking down into carbon dioxide, water, and biomass.



# Conditions for Biodegradation

Occurs under specific conditions:

- Temperature: 50–60°C
- Relative Humidity: 50–60%
- Presence of natural microorganisms

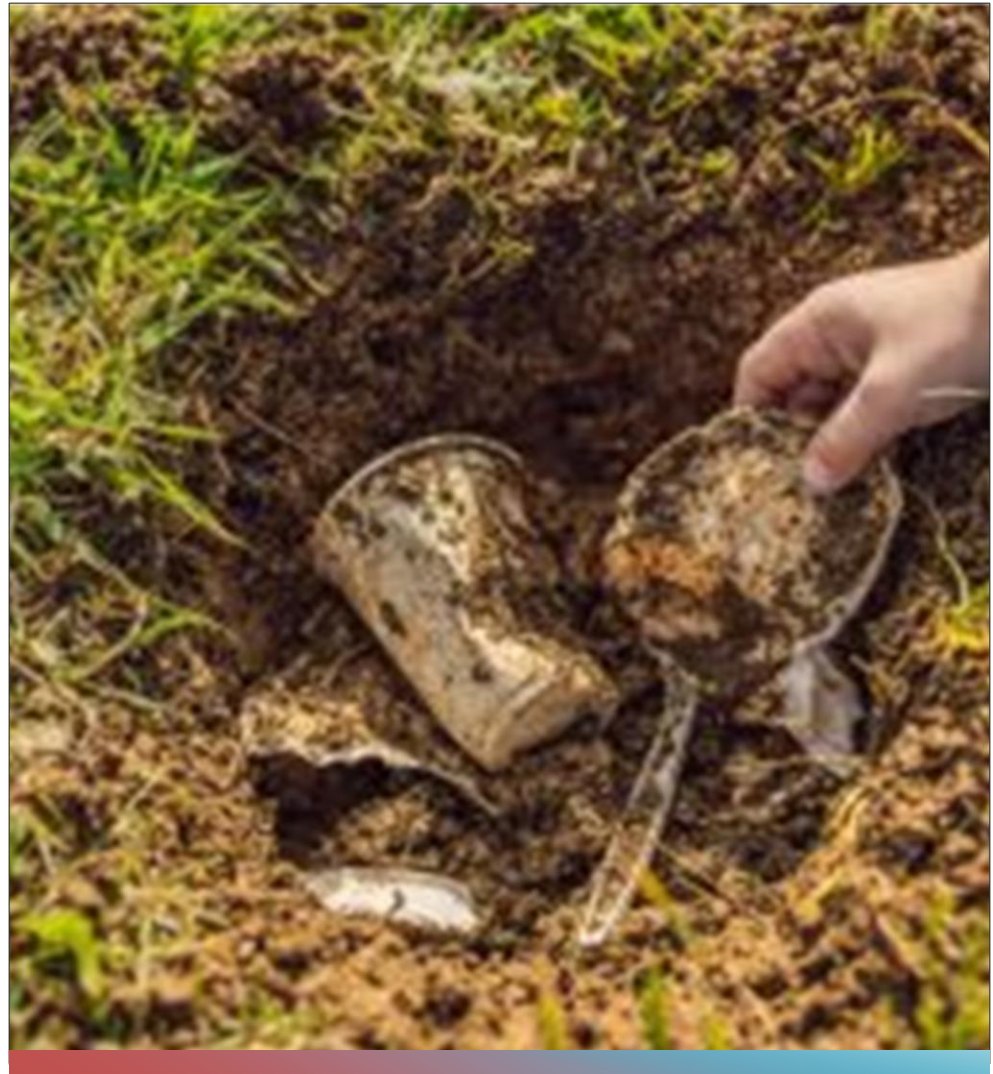

# Learning Resource

How to make  
bioplastic Sample 1

Watch the 360° video: Biodegradation of Bioplastics

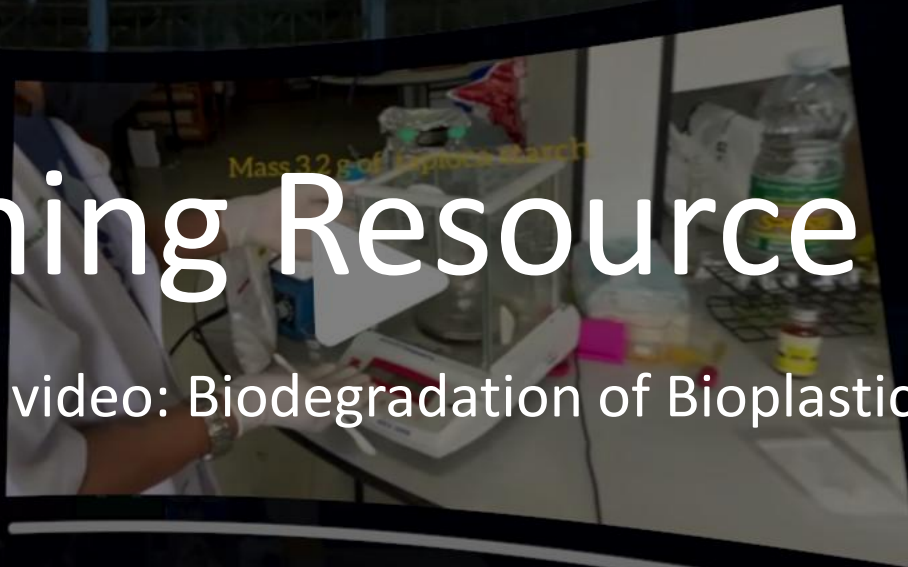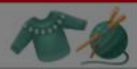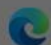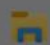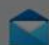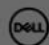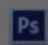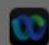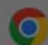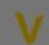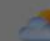

21°C มีเมฆส่วนใหญ่

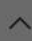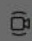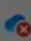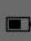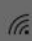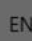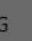



# Equipment and Chemicals

- Equipment: Test tube rack, 100/150 mL beakers, two 10 mL cylinders, four small test tubes, two stirring rods, scale
- Chemical: 1.0 M NaOH solution

# Experiment Part 1: PET Degradation (Step 1)

Cut PET into  $\sim 0.5$  g pieces and place in a small beaker.

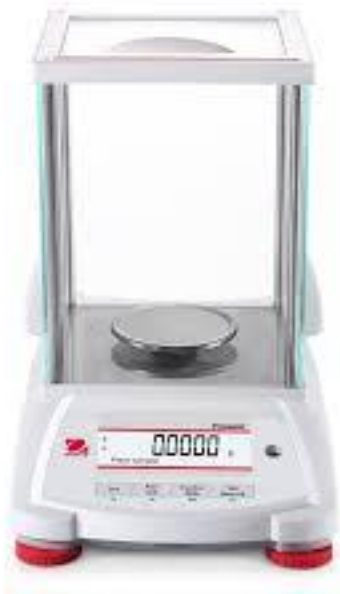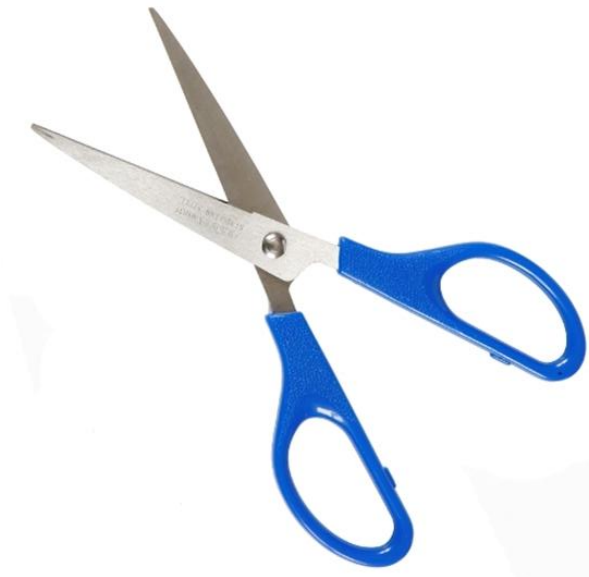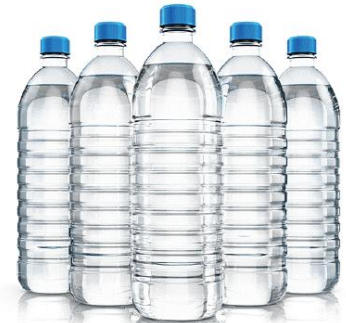

# Experiment Part 1: PET Degradation (Step 2)

- Add 10–15 mL of 1.0 M NaOH solution into the beaker.

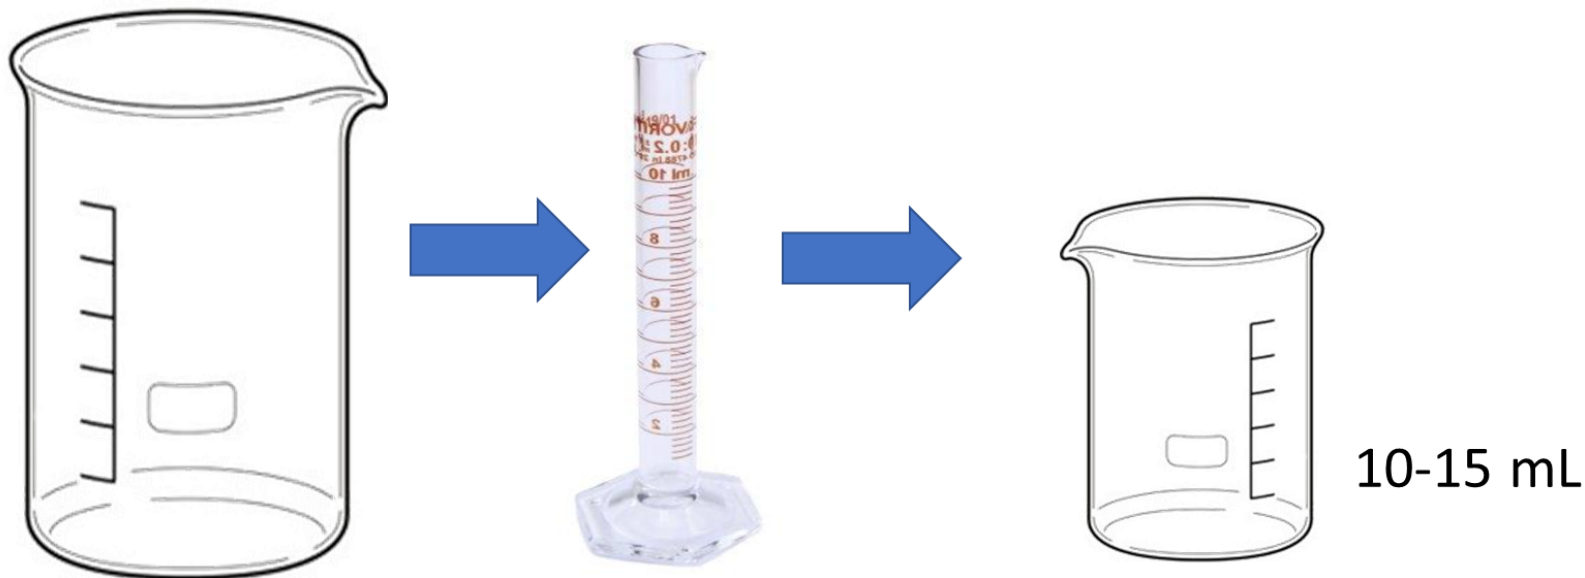

# Experiment Part 1: PET Degradation (Step 3-4)

- Let the sample sit for 1 hour while proceeding to other tasks.
- After 1 hour, observe and record the degradation result.

# Experiment Part 2: Bioplastic Degradation (Step 1)

- Cut bioplastic samples ( $\sim 0.1$  g) into 3 pieces using scissors.
- Ensure each piece is uniform and weigh each one.

---

## Experiment Part 2: Bioplastic Degradation (Step 2)

- Place one sample into each of the small test tubes.

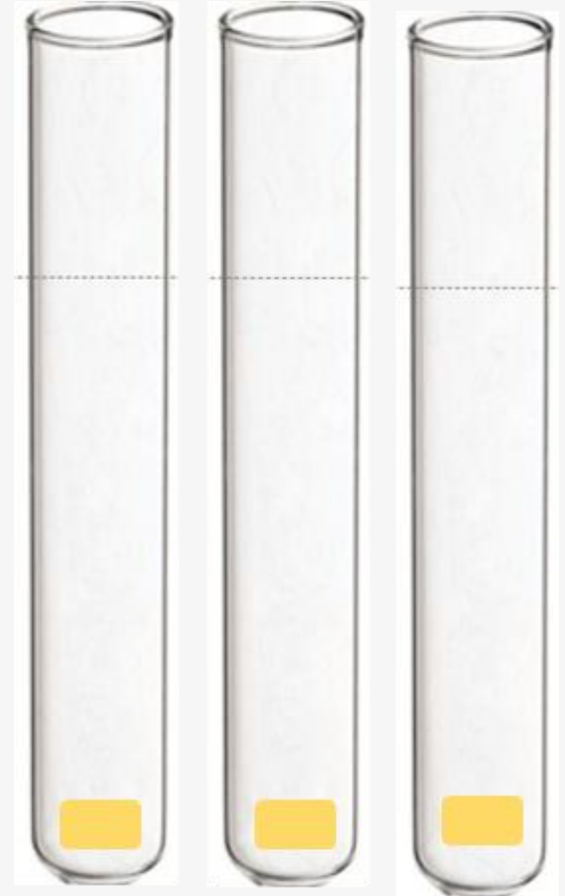



# Experiment Part 2: Bioplastic Degradation (Step 3)

- Add 3.5 mL of 1.0 M NaOH into each test tube.
- Stir each tube for 3 minutes using a glass rod.

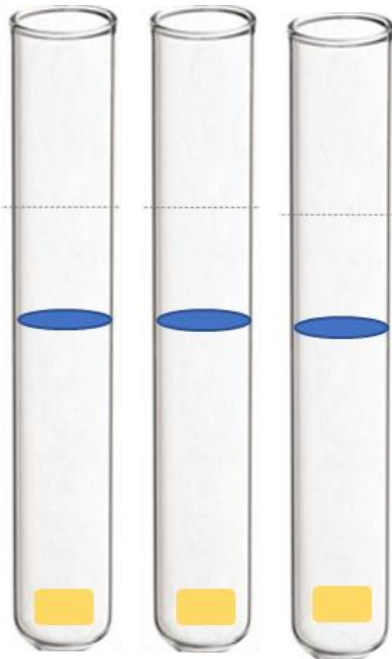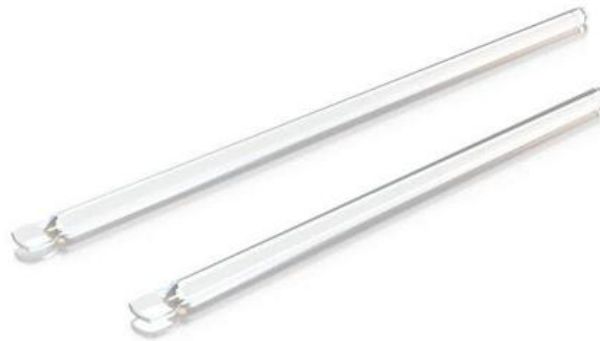

## Experiment Part 2: Bioplastic Degradation (Step 4)

- Use a smartphone lux meter to measure light intensity every 5 minutes.
- Record the results.

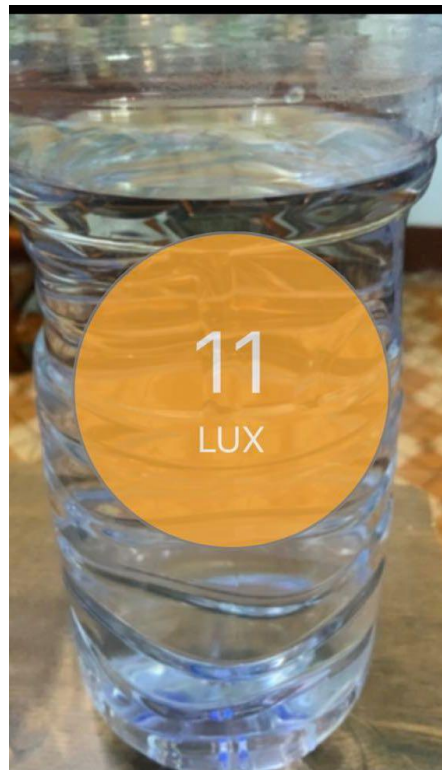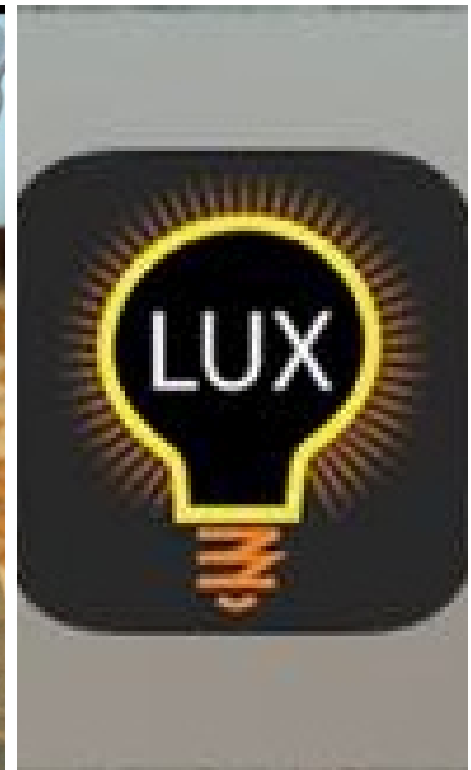

# Record Your Observations

- .....
- .....



# Conclusion



- Summarize the outcome of the experiment:
- .....



# Reflection Activity

---

Brainstorm ideas on paper  
using blue or black pen.

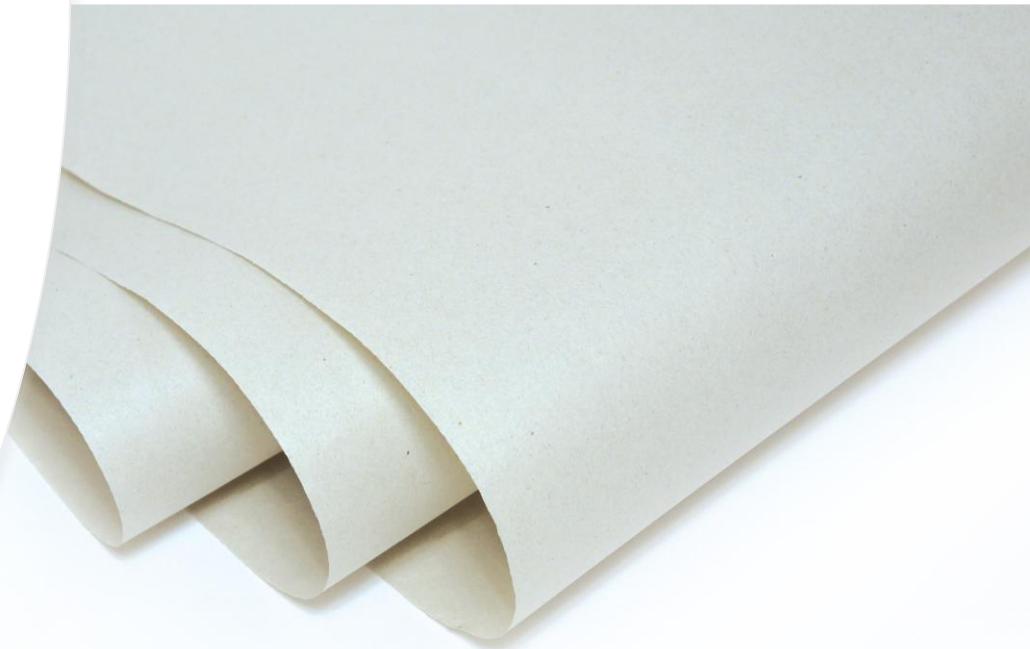

# Flowchart Task

- Create a flowchart showing the bioplastic synthesis process.
- Example shown as follows.





## Conclusion from the Main Question

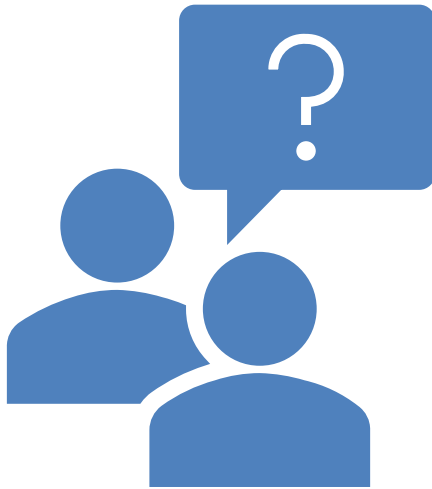

- Summarize your learning based on the initial question:
- .....

# **Experiment #3:**

# **Polymer Classification**



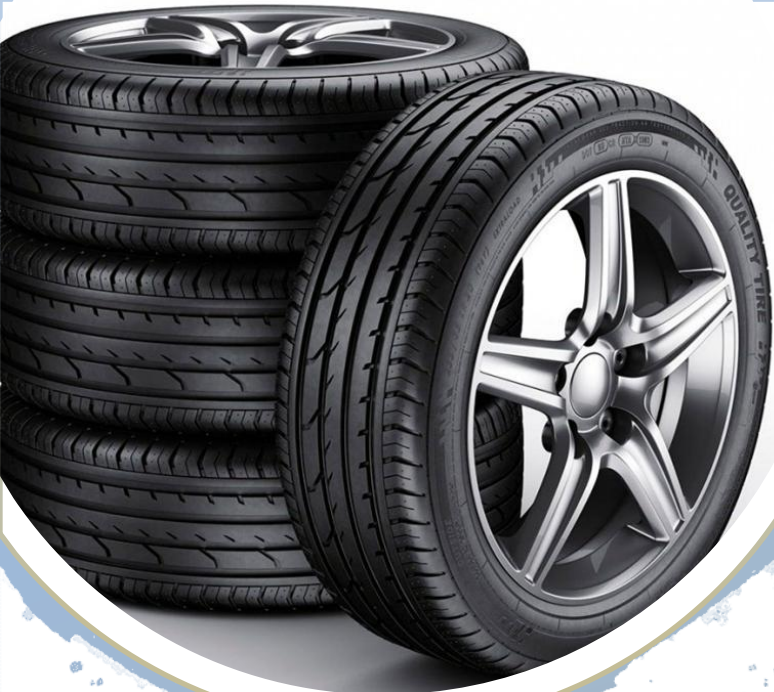

# How Are Polymers Classified?

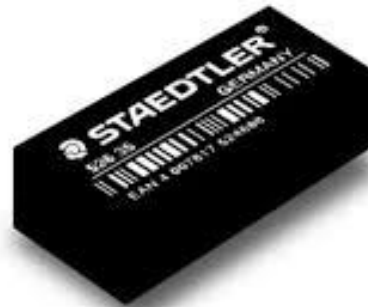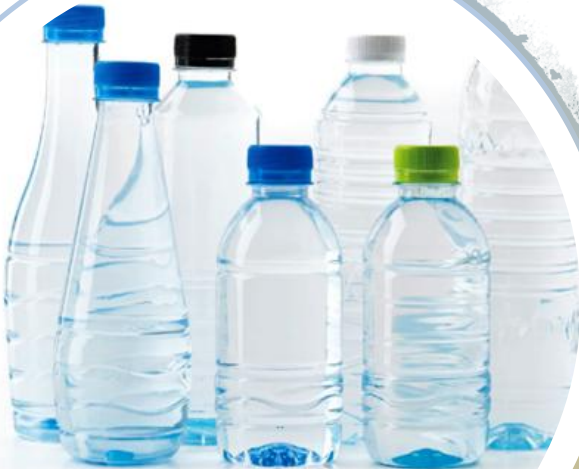

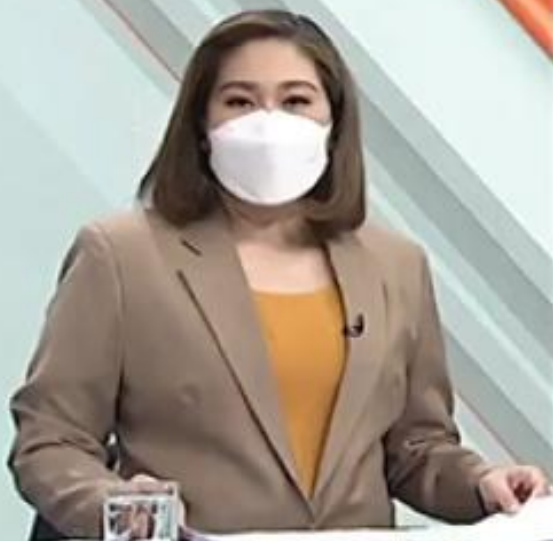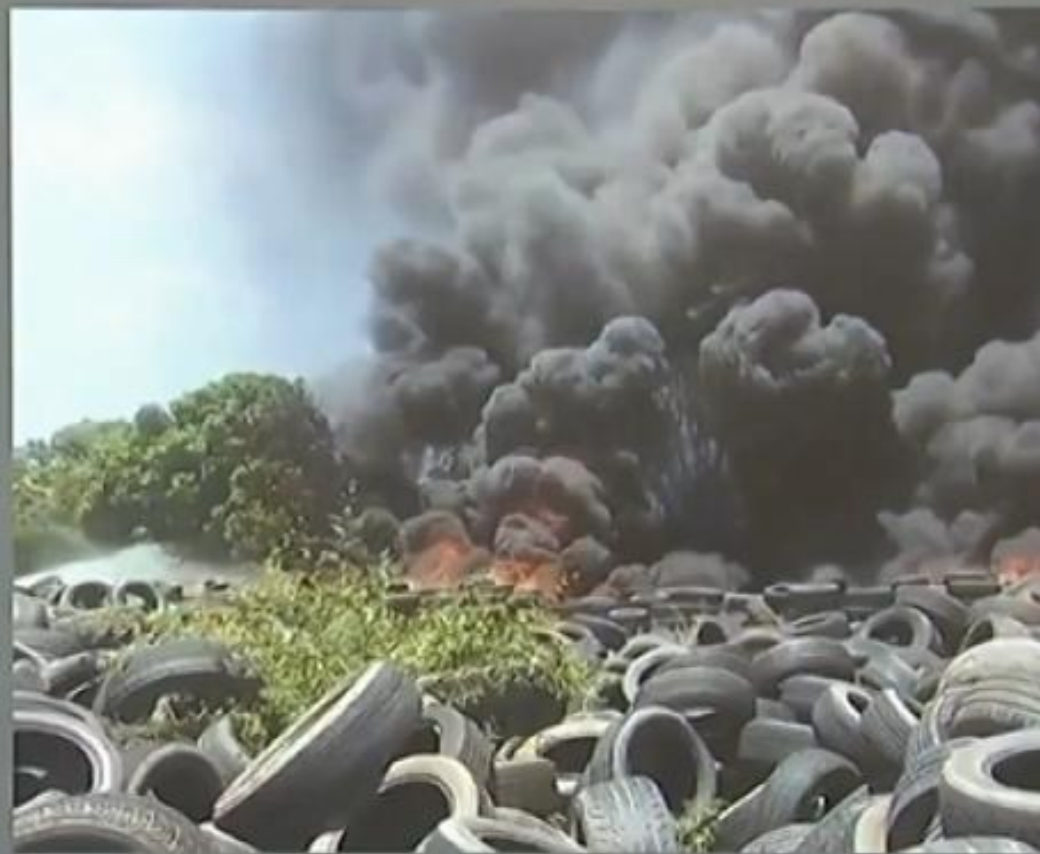

How Are Polymers Classified?

ทันข่าว

ไทยพีบีเอส

# Start with an Open-ended Question:

---

What is the  
difference between  
thermoplastic and  
thermosetting  
polymers?

---



# Thermoplastic Polymers

---

- Thermoplastics soften and melt when heated and harden when cooled.
- They can be remelted and reshaped multiple times.
- Thermoplastics are ideal for manufacturing various products.

# Thermosetting Polymers

- Thermosets have a cross-linked molecular structure.
- They degrade when heated and cannot be remelted.
- Cross-linking restricts molecular movement, making reuse difficult.

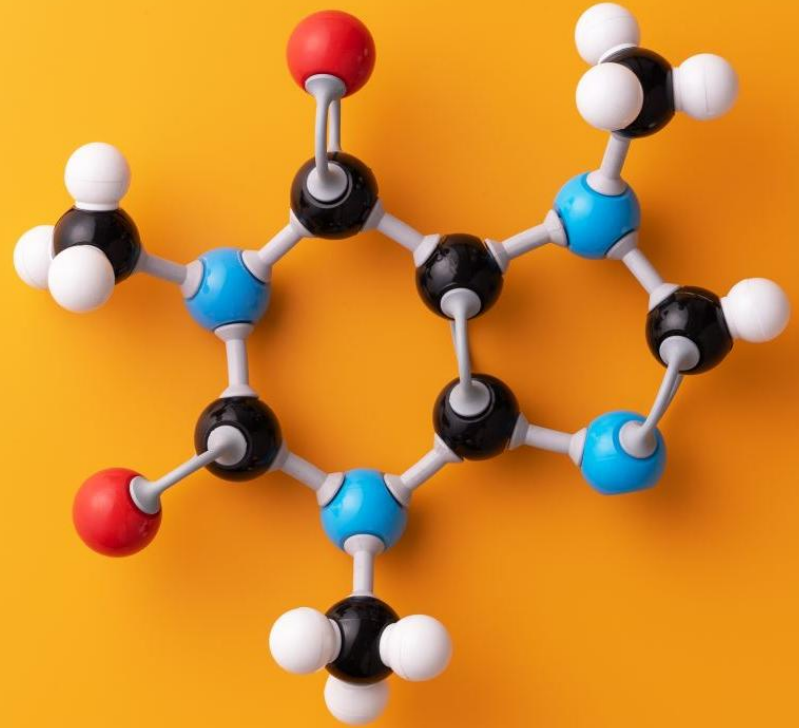



# Equipment

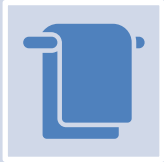

Thermal sensor, smartphone, spatula, pan handle, pot handle,

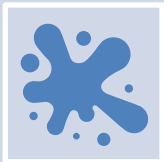

PET bottle, foam container, yogurt cup, plastic bag, beaker

## Experimental Method (1)

- 1. Download a thermal sensor app on a smartphone.
- 2. Connect the sensor to the phone (see Figures 1 and 2).

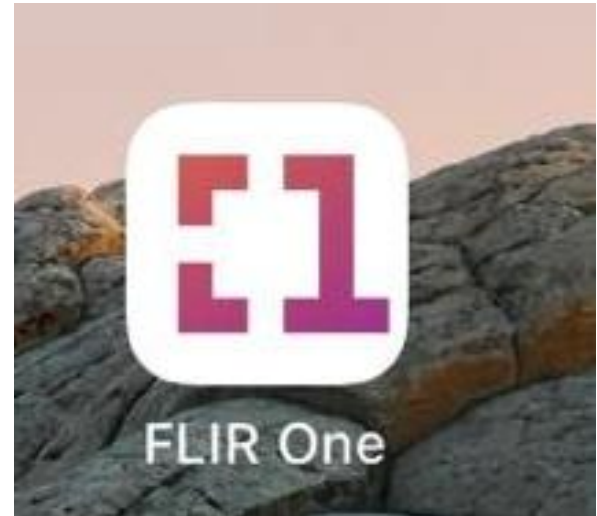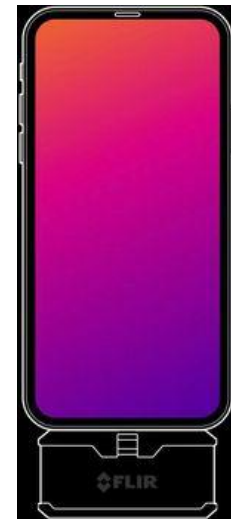

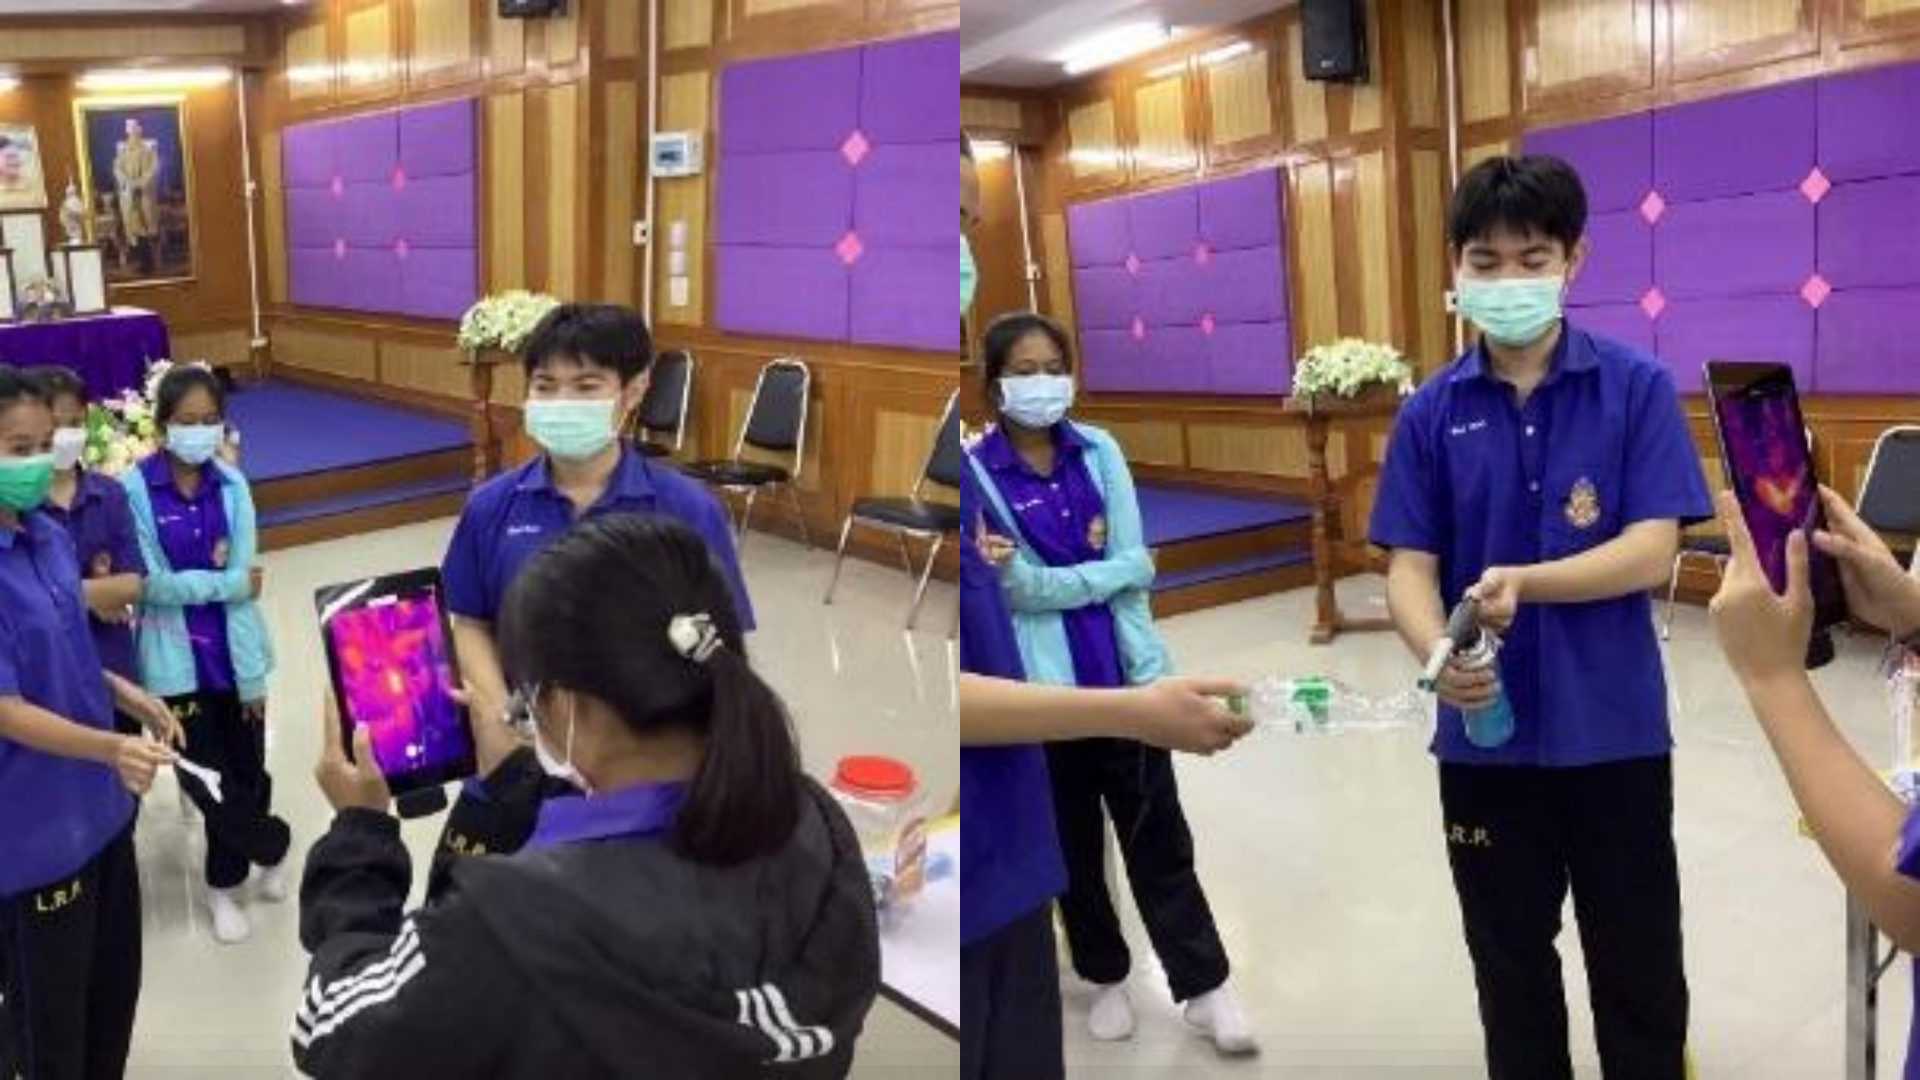

## Experimental Method (2)

3. Use a gas torch to test the polymer samples provided.

4. Record your experimental results.

## Experimental Method (3)

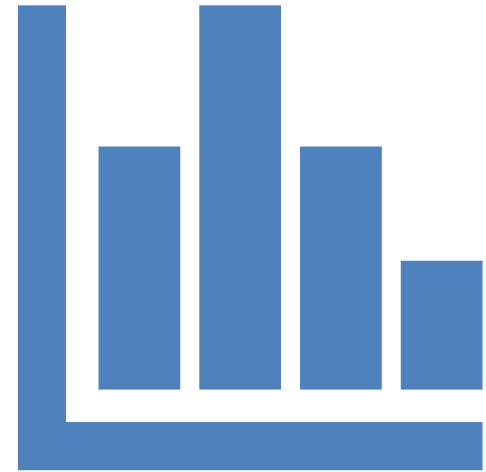

# Record Your Observations

- .....
- .....

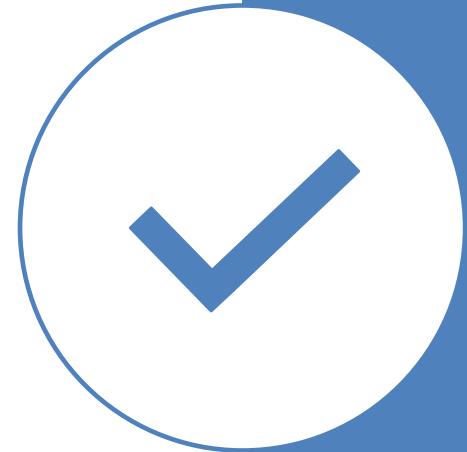

# Conclusion

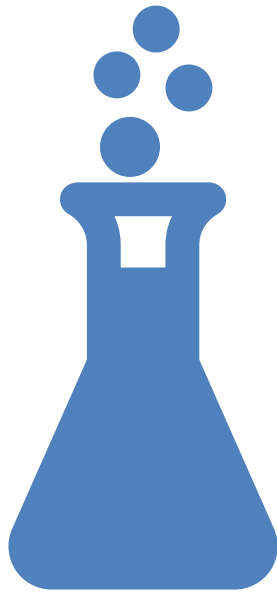

- Summarize the outcome of the experiment:
- .....



# Reflection Activity

---

Brainstorm ideas on paper  
using blue or black pen.





# Flowchart Task

- Create a flowchart showing the bioplastic synthesis process.
- Example shown as follows.



## Conclusion from the Main Question



- Summarize your learning based on the initial question:
- .....
