# Supplementary material for: Enhancing chemistry understanding and attitudes through an outreach education program on circular plastic economy: a case study with Thai twelfth-grade students
Source: publisher site journal article supplement (doi:10.1515/cti-2025-0009), 2025-07-11
Supplement: Supplementary file 2 [file j_cti-2025-0009_suppl_002.docx]

**Supplementary Material #4**

**Expanded View of the Results presented in Figure 3**

**Research Article**

“Enhancing Chemistry Understanding and Attitudes through an Outreach Education Program on Circular Plastic Economy: A Case Study with Thai Twelfth-Grade Students”

**Authors**

Banjong Prasongsap1, Pawat Chaipidech1,2, & Niwat Srisawasdi1,2*
1Faculty of Education, Khon Kaen University, Khon Kaen 40002, Thailand
2Digital Education and Learning Engineering Association, Nonthaburi 11110, Thailand
**Corresponding Author*

# CLASS-Chem Questionnaire (English Version)

Name: ................................................ Grade Level: ............... Student No.: .....................

**Instructions:**

This questionnaire is about your attitudes and beliefs related to learning chemistry. Please circle the number that best represents your level of agreement with each statement below.

1 = Strongly Disagree
2 = Disagree
3 = Neutral
4 = Agree
5 = Strongly Agree

1. A significant problem in learning chemistry is being able to memorize all the information I need to know.

1 2 3 4 5

2. To understand a chemical reaction, I think about the interactions between atoms and molecules.

1 2 3 4 5

3. When I am solving a chemistry problem, I try to decide what would be a reasonable value for the answer.

1 2 3 4 5

4. I think about the chemistry I experience in everyday life.

1 2 3 4 5

5. It is useful for me to do lots and lots of problems when learning chemistry.

1 2 3 4 5

6. After I study a topic in chemistry and feel that I understand it, I have difficulty solving problems on the same topic.

1 2 3 4 5

7. Knowledge in chemistry consists of many disconnected topics.

1 2 3 4 5

8. As chemists learn more, most chemistry ideas we use today are likely to be proven wrong.

1 2 3 4 5

9. When I solve a chemistry problem, I locate an equation that uses the variables given in the problem and plug in the values.

1 2 3 4 5

10. I find that reading the text in detail is a good way for me to learn chemistry.

1 2 3 4 5

11. I think about how the atoms are arranged in a molecule to help my understanding of its behavior in chemical reactions.

1 2 3 4 5

12. If I have not memorized the chemical behavior needed to answer a question on an exam, there's nothing much I can do (legally!) to figure out the behavior.

1 2 3 4 5

13. I am not satisfied until I understand why something works the way it does.

1 2 3 4 5

14. I cannot learn chemistry if the teacher does not explain things well in class.

1 2 3 4 5

15. I do not expect equations to help my understanding of the ideas in chemistry. They are just for doing calculations.

1 2 3 4 5

16. I study chemistry to learn knowledge that will be useful in my life outside of school.

1 2 3 4 5

17. I can usually make sense of how two chemicals react with one another.

1 2 3 4 5

18. If I get stuck on a chemistry problem on my first try, I usually try to figure out a different way that works.

1 2 3 4 5

19. Nearly everyone is capable of understanding chemistry if they work at it.

1 2 3 4 5

20. Understanding chemistry basically means being able to recall something you have read or been shown

1 2 3 4 5

21. Why chemicals react the way they do does not usually make sense to me. I just memorize what happens.

1 2 3 4 5

22. To understand chemistry I discuss it with friends and other students.

1 2 3 4 5

23. I do not spend more than five minutes stuck on a chemistry problem before giving up or seeking help from someone else.

1 2 3 4 5

24. If I do not remember a particular equation needed to solve a problem on an exam, there is nothing much I can do (legally!) to come up with it.

1 2 3 4 5

25. If I want to apply a method used for solving one chemistry problem to another problem, the problems must involve very similar situations.

1 2 3 4 5

26. In doing a chemistry problem, if my calculation gives a result very different from what I would expect, I would trust the calculation rather than going back through the problem.

1 2 3 4 5

27. In chemistry, it is important for me to make sense out of mathematical formulas before I can use them correctly.

1 2 3 4 5

28. I enjoy solving chemistry problems.

1 2 3 4 5

29. When I see a chemical formula, I try to picture how the atoms are arranged and connected.

1 2 3 4 5

30. In chemistry, mathematical formulas express meaningful relationships among measurable quantities.

1 2 3 4 5

31. We use this statement to discard the survey of people who are not reading the questions. Please select agree (not strongly agree) for this question.

1 2 3 4 5

32. It is important for the government to approve new scientific ideas before they can be widely accepted.

1 2 3 4 5

33. The arrangement of the atoms in a molecule determines its behavior in chemical reactions.

1 2 3 4 5

34. Learning chemistry changes my ideas about how the world works.

1 2 3 4 5

35. To learn chemistry, I only need to memorize how to solve sample problems.

1 2 3 4 5

36. Reasoning skills used to understand chemistry can be helpful to me in my everyday life.

1 2 3 4 5

37. In learning chemistry, I usually memorize reactions rather than make sense of the underlying physical concepts.

1 2 3 4 5

38. Spending a lot of time understanding where mathematical formulas come from is a waste of time.

1 2 3 4 5

39. I find carefully analyzing only a few problems in detail is a good way for me to learn

chemistry.

1 2 3 4 5

40. I can usually figure out a way to solve chemistry problems.

1 2 3 4 5

41. The subject of chemistry has little relation to what I experience in the real world.

1 2 3 4 5

42. There are times I solve a chemistry problem more than one way to help my understanding.

1 2 3 4 5

43. To understand chemistry, I sometimes think about my personal experiences and relate them to the topic being analyzed.

1 2 3 4 5

44. Thinking about a molecule’s three-dimensional structure is important for learning chemistry.

1 2 3 4 5

45. It is possible to explain chemistry ideas without mathematical formulas.

1 2 3 4 5

46. When I solve a chemistry problem, I explicitly think about which chemistry ideas apply to the problem.

1 2 3 4 5

47. If I get stuck on a chemistry problem, there is no chance I will figure it out on my own.

1 2 3 4 5

48. Spending a lot of time understanding why chemicals behave and react the way they do is a waste of time.

1 2 3 4 5

49. When studying chemistry, I relate the important information to what I already know rather than just memorizing it the way it is presented.

1 2 3 4 5

50. When I am solving chemistry problems, I often do not really understand what I am doing.

1 2 3 4 5
