# Supplementary material for: Enhancing chemistry understanding and attitudes through an outreach education program on circular plastic economy: a case study with Thai twelfth-grade students
Source: publisher site journal article supplement (doi:10.1515/cti-2025-0009), 2025-07-11

**Supplementary Material #4**

**Expanded View of the Results presented in Figure 3**

**Research Article**

“Enhancing Chemistry Understanding and Attitudes through an Outreach Education Program on Circular Plastic Economy: A Case Study with Thai Twelfth-Grade Students”

**Authors**

Banjong Prasongsap1, Pawat Chaipidech1,2, & Niwat Srisawasdi1,2*
1Faculty of Education, Khon Kaen University, Khon Kaen 40002, Thailand
2Digital Education and Learning Engineering Association, Nonthaburi 11110, Thailand
**Corresponding Author*


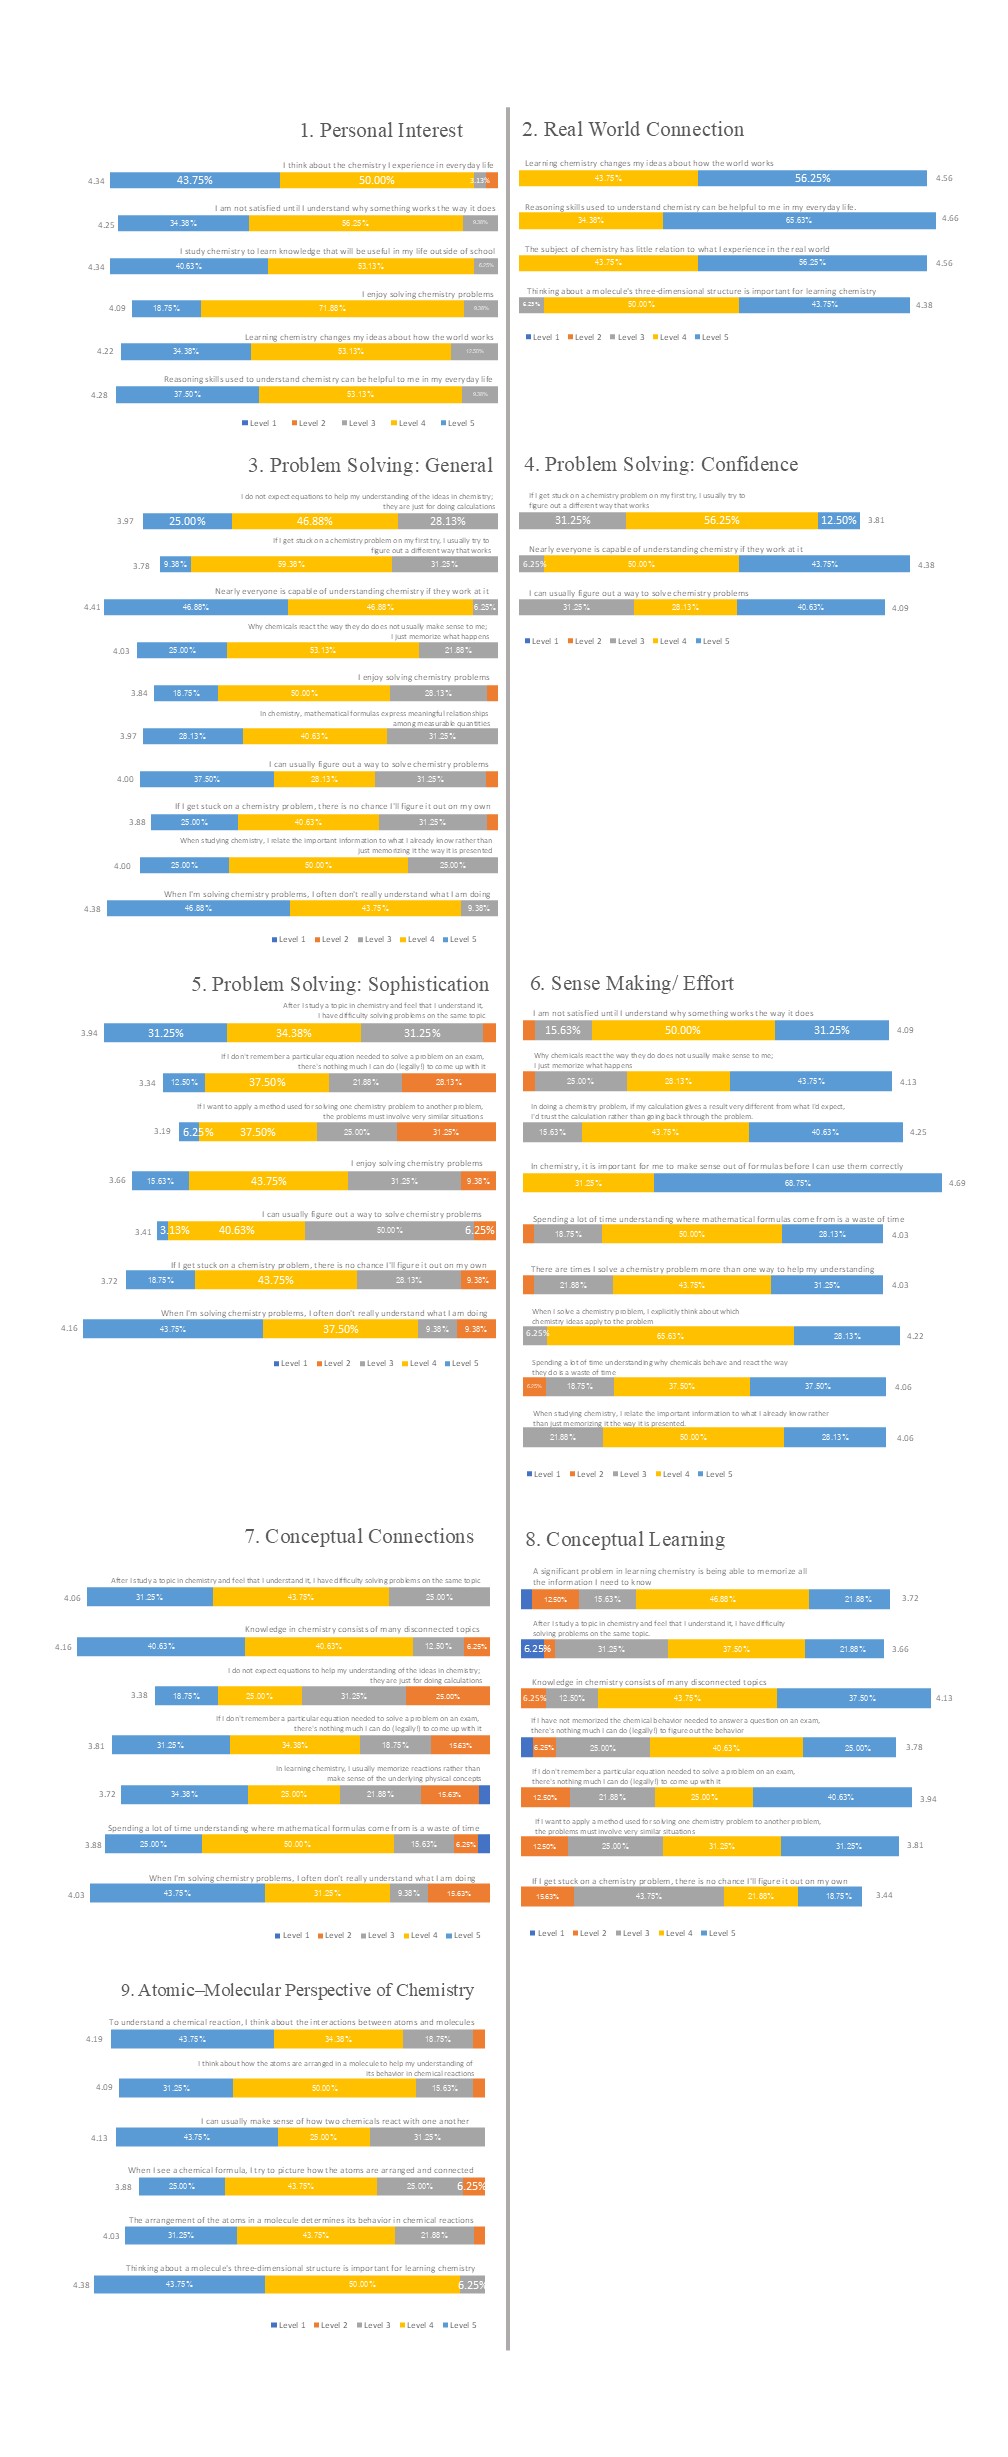


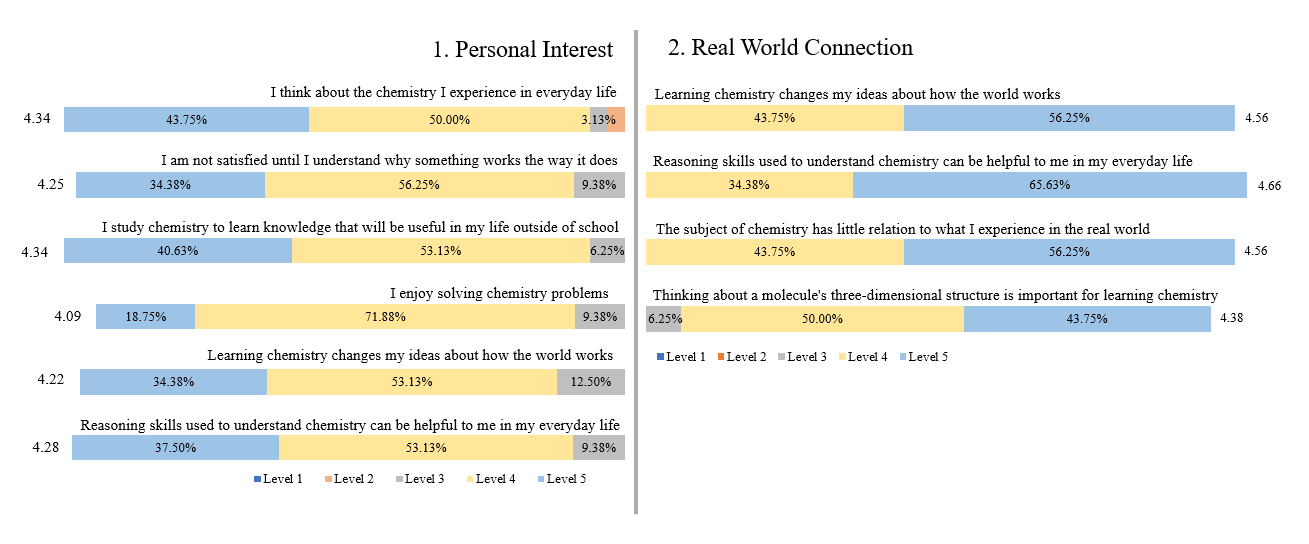


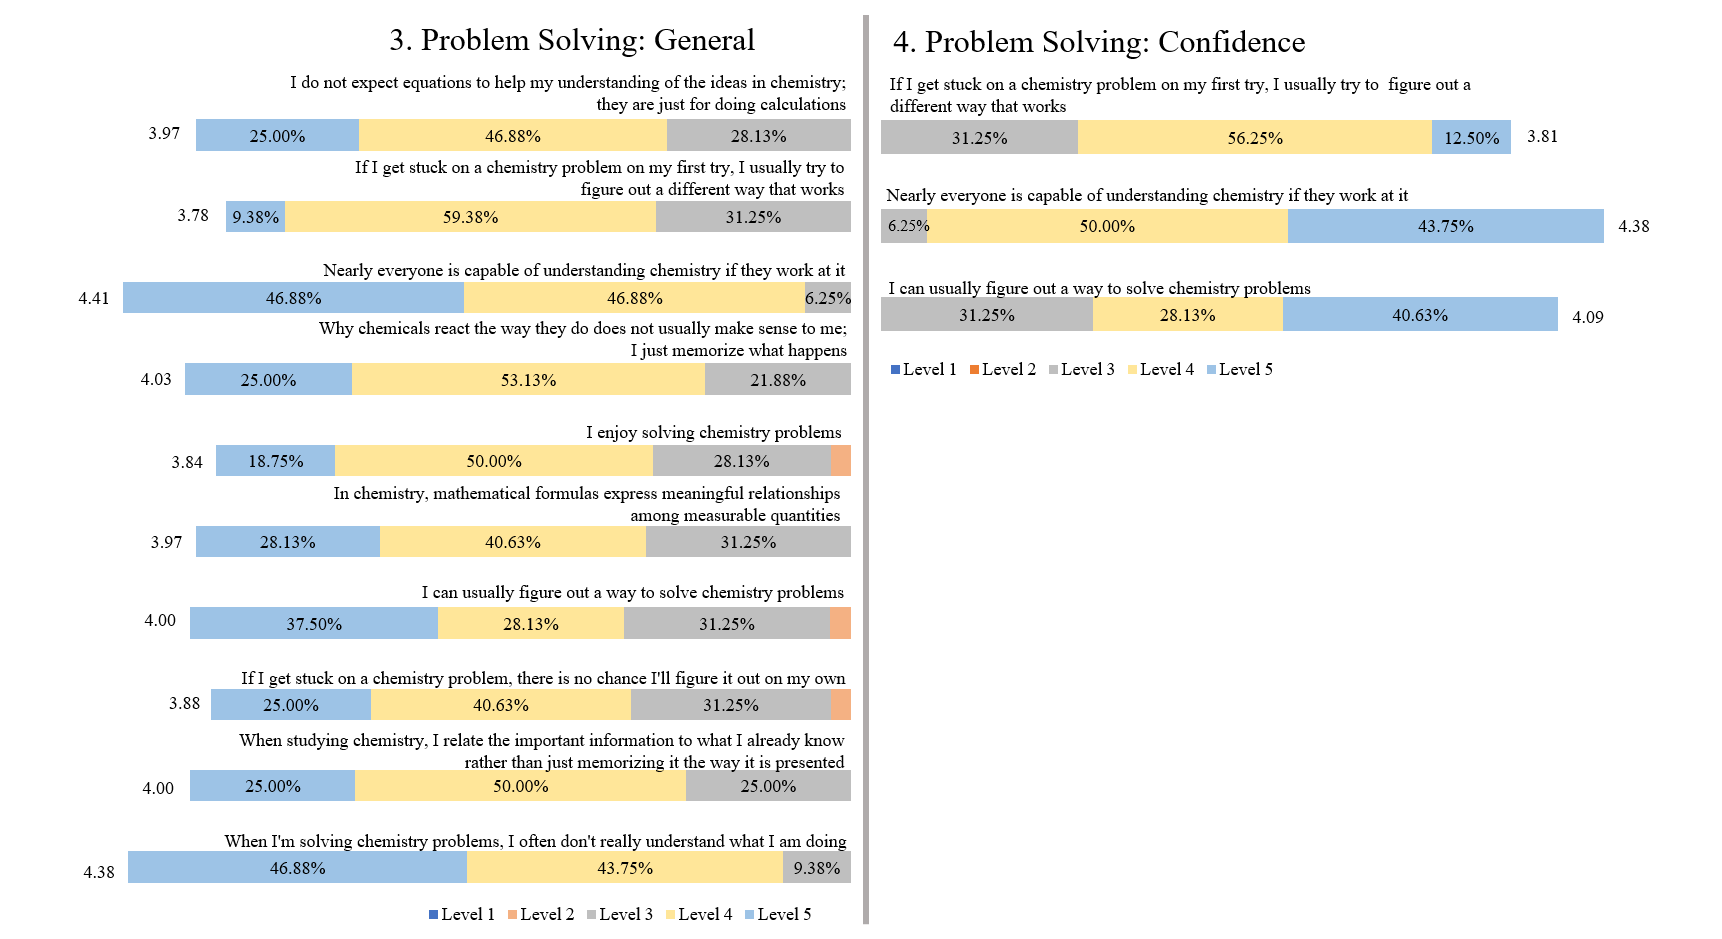


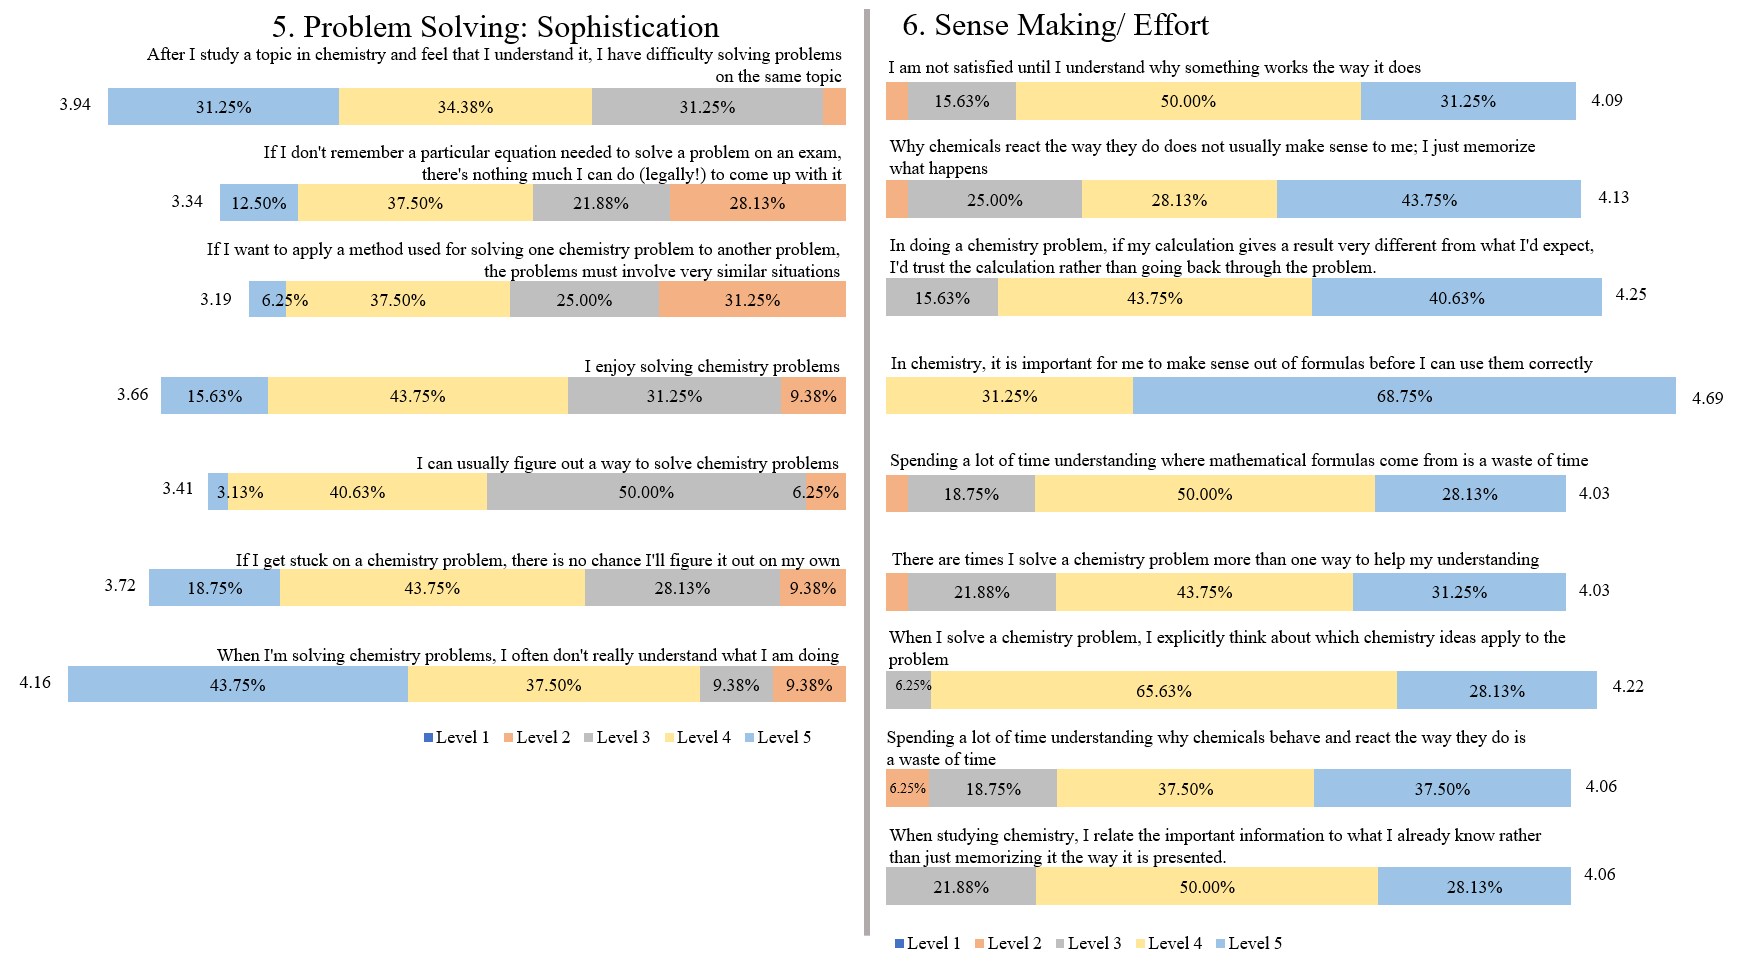


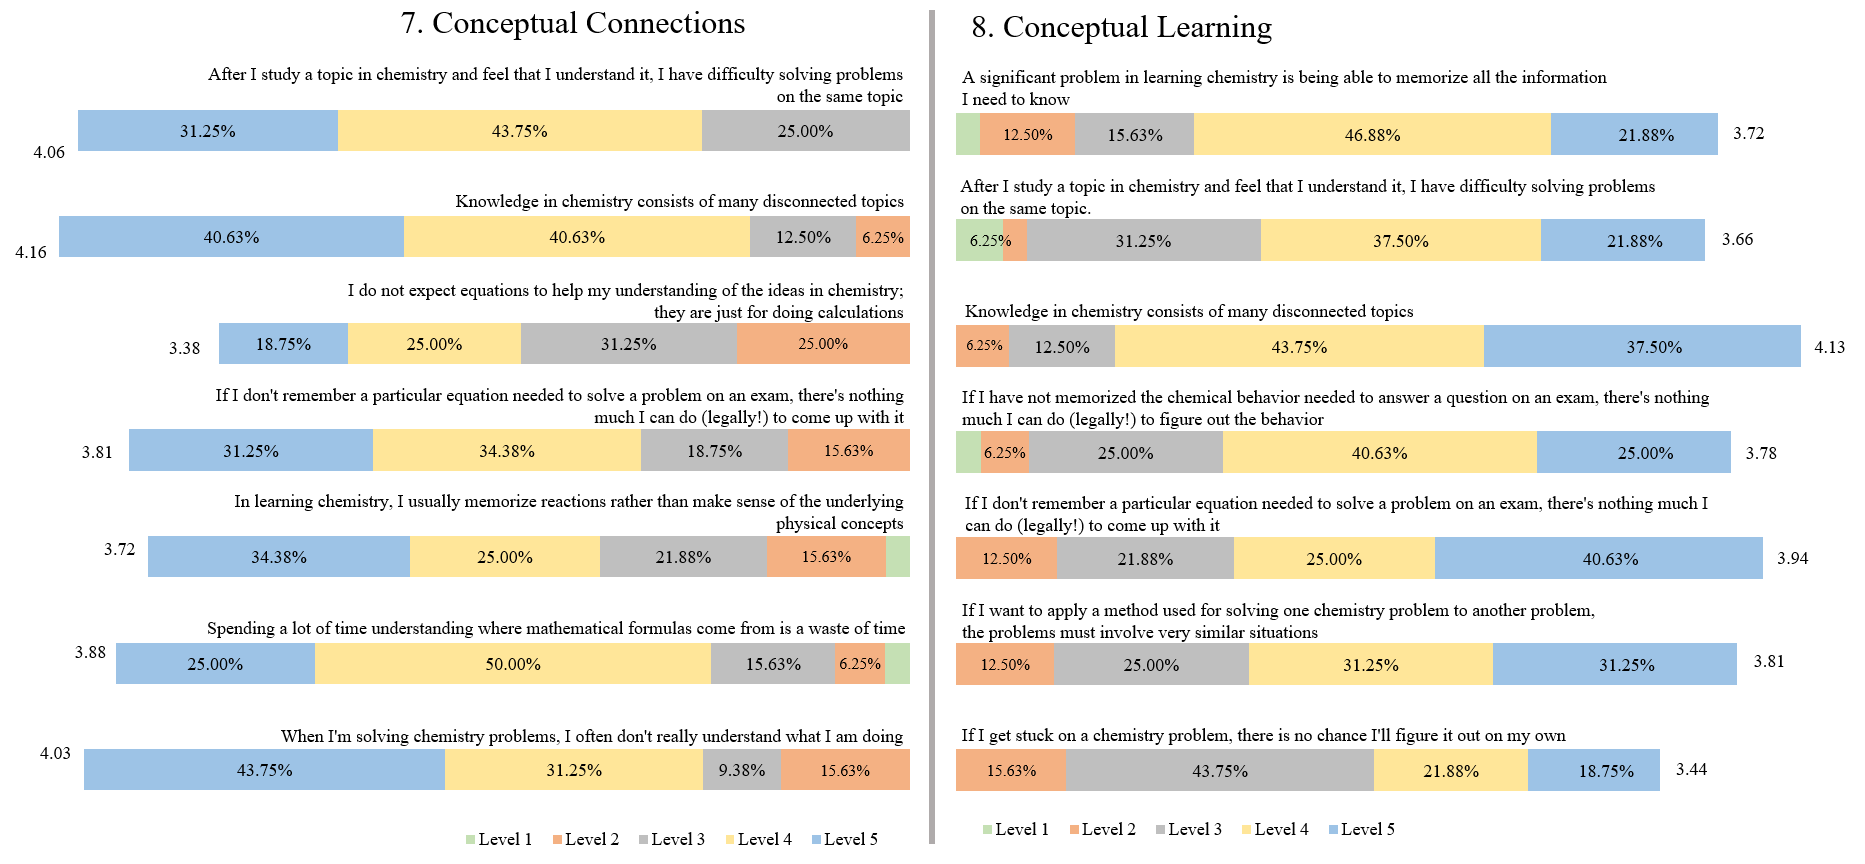


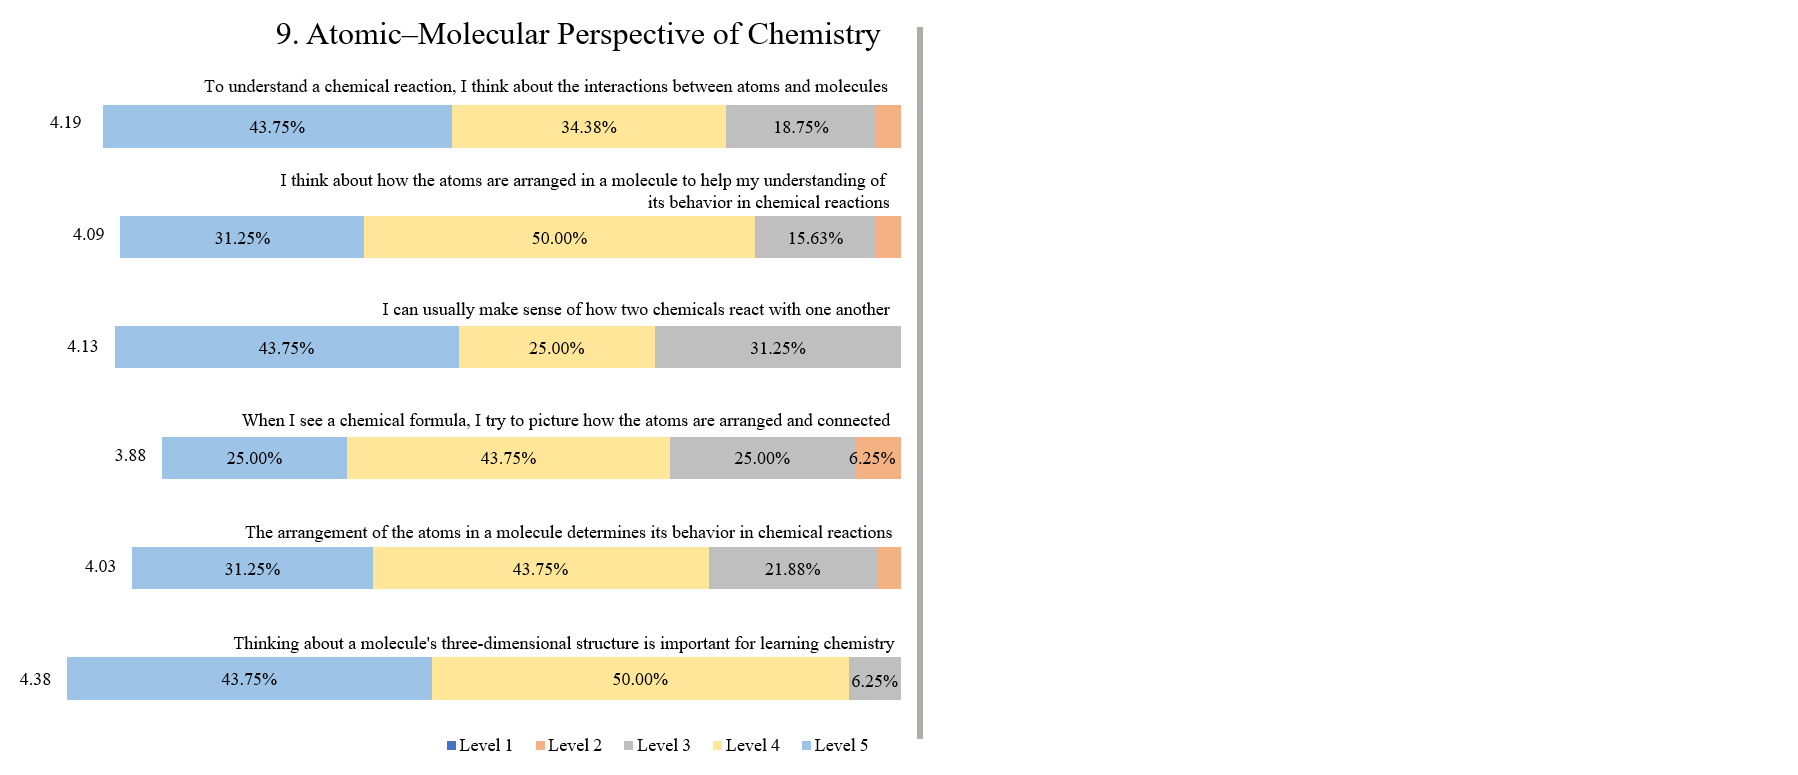

Supplement: Supplementary file 3 [file j_cti-2025-0009_suppl_004.docx]
